# Supplementary material for: Convenient one-pot access to 2H-3-nitrothiochromenes from 2-bromobenzaldehydes, sodium sulfide and β-nitrostyrenes
Source: Royal Society of Chemistry journal article supplement (doi:10.1039/c9ob01060b), 2019-01-01
Supplement: c9ob01060b1.pdf [file c9ob01060b1.pdf]

## Convenient one-pot access to 2*H*-3-nitro-thiochromenes from 2-bromobenzaldehydes, sodium sulfide and $\beta$ -nitrostyrenes

Thi Thu Huong Le,<sup>a</sup> Chitose Youhei,<sup>a,b</sup> Quy Hien Le,<sup>a</sup> Thanh Binh Nguyen,<sup>\*c</sup> Dinh Hung Mac,<sup>\*a</sup>

<sup>a</sup> Medicinal Chemistry Laboratory, Faculty of Chemistry, VNU University of Science, 19 Le Thanh Tong, Ha Noi, Viet Nam, email [macdinhhung@hus.edu.vn](mailto:macdinhhung@hus.edu.vn)

<sup>b</sup> Department of Chemistry, Graduate School of Science, Hiroshima University, 1-3-1 Kagamiyama, Higashihiroshima, Hiroshima 739-8526, Japan

<sup>c</sup> Institut de Chimie des Substances Naturelles, CNRS UPR 2301, Université Paris-Sud, Université Paris-Saclay, 1 avenue de la Terrasse, 91198 Gif-sur-Yvette, France email [nguyen@icsn.cnrs-gif.fr](mailto:nguyen@icsn.cnrs-gif.fr)

### Supporting information

All the reactions were carried out under Nitrogen atmosphere. Unless otherwise noted, all the reagents obtained from commercial sources were used without further purification. All solvents were dried by standard methods. Tetrahydrofuran were dried with sodium and benzophenone and were used immediately after distillation. Dichloromethane was dried with diphosphorus pentoxide (P<sub>2</sub>O<sub>5</sub>). Pentane was distilled and then dried with sodium. Analytical thin-layer chromatography (TLC) was performed on 0.25 mm Merck precoated silica gel plates (60-F<sub>254</sub>). Column chromatography was carried out with the same kind of silica gel. The TLC plates were visualized with a UV lamp (254 nm and 366 nm) and/or with TLC visualizing solutions activated with heat, including: *p*-anisaldehyde solution and potassium permanganate solution. <sup>1</sup>H-NMR and <sup>13</sup>C-NMR were recorded on BRUKER 500 MHz Ascend (Hanoi University of Science, Vietnam National University) instruments using tetramethylsilane (TMS) as the internal standard and CDCl<sub>3</sub> as the solvent (<sup>1</sup>H-NMR: TMS at 0.00 ppm, CDCl<sub>3</sub>: at 7.26 ppm; <sup>13</sup>C-NMR: CDCl<sub>3</sub> at 77.0 ppm). Chemical shifts are reported in parts per million (ppm). Data are reported as follows: chemical shift, multiplicity (s= singlet, d= doublet, t= triplet, q= quartet, m= multiplet), coupling constants (Hertz), and integration. X-Ray experiment has been performed with Bruker D8 Quest, Mass spectral analyzes have been performed with a LTQ Orbitrap XL (Hanoi University of Science, Vietnam National University)

### General procedure for the synthesis of thiochromene

Na<sub>2</sub>S.9H<sub>2</sub>O (1 equiv) was dissolved in DMA under nitrogen atmosphere at 90°C over 30 min then 2-bromobenzaldehyde (1.5 equiv) were added to the solution and stirred for another 90 min at 90°C. After cooled to room temperature, nitrostyrene (2.5 equiv) and K<sub>2</sub>CO<sub>3</sub> (2.5 equiv) were added to the mixture and the solution was

stirred for 20h at room temperature. After completion of reaction, the reaction was diluted by water extracted by dichloromethane (3x10ml). The organic layer was evaporated by vacuum to obtain crude product. The crude was purified by column chromatography (hexane: EtOAc = 15: 1).

### 3-nitro-2-phenyl-2*H*-thiochromene (3a)

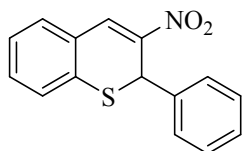

148mg, 55% in 1 mmol scale

<sup>1</sup>H NMR (500 MHz, Chloroform-*d*) δ 8.23 (s, 1H), 7.48 (d, *J* = 7.6 Hz, 1H), 7.33 (t, *J* = 7.5 Hz, 1H), 7.29 – 7.14 (m, 8H), 5.55 (s, 1H).

<sup>13</sup>C NMR (126 MHz, CDCl<sub>3</sub>) δ 143.69, 139.97, 132.41, 132.26, 132.23, 132.17, 129.43, 129.16, 128.98, 128.50, 128.25, 127.40, 126.44, 126.22, 39.86.

HRMS *m/z* calculated for [M+Na]<sup>+</sup> C<sub>15</sub>H<sub>11</sub>NNaO<sub>2</sub>S 292.0408 found 292.0413

### 2-(2-fluorophenyl)-3-nitro-2*H*-thiochromene (3b)

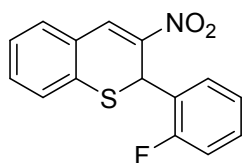

24mg, 42% in 0.2 mmol scale

<sup>1</sup>H NMR (500 MHz, Chloroform-*d*) δ 8.41 (d, *J* = 13.7 Hz, 1H), 8.36 (s, 1H), 7.70 – 7.54 (m, 2H), 7.53 – 7.47 (m, 2H), 7.47 – 7.39 (m, 2H), 7.38 – 7.32 (m, 1H), 7.32 – 7.27 (m, 1H), 7.30 – 7.23 (m, 2H), 7.22 – 7.12 (m, 3H), 7.04 (td, *J* = 7.6, 1.3 Hz, 1H), 6.94 (dd, *J* = 7.8, 1.6 Hz, 1H), 6.04 (s, 1H).

<sup>13</sup>C NMR (126 MHz, CDCl<sub>3</sub>) δ 158.61 (d, *J*<sub>C-F</sub> = 249.4 Hz), 142.05, 133.38, 132.53, 132.24, 132.11, 130.10 (d, *J*<sub>C-F</sub> = 8.5 Hz), 128.10, 127.56, 127.04 (d, *J*<sub>C-F</sub> = 2.7Hz) 126.80, 126.70, 126.54, 124.34 (d, *J*<sub>C-F</sub> = 3.8 Hz), 116.16 (d, *J*<sub>C-F</sub> = 21.3 Hz), 32.83 (d, *J* = 4.4 Hz).

<sup>19</sup>F-NMR (471MHz, CDCl<sub>3</sub>) δ -116.5

HRMS *m/z* calculated for [M+Na]<sup>+</sup> C<sub>15</sub>H<sub>10</sub>FNNaO<sub>2</sub>S 310.0314 found 310.0319

### 2-(4-fluorophenyl)-3-nitro-2*H*-thiochromene (3c)

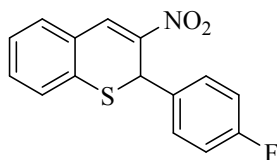

30mg, 52% in 0.2mmol scale

$^1\text{H}$  NMR (500 MHz, Chloroform-*d*)  $\delta$  8.12 (s, 1H), 7.38 (d,  $J = 7.6$  Hz, 1H), 7.25 – 7.22 (m, 1H), 7.16 (dd,  $J = 13.7, 7.8$  Hz, 1H), 7.08 (dd,  $J = 8.6, 5.2$  Hz, 1H), 6.81 (t,  $J = 8.6$  Hz, 1H), 5.43 (s, 1H).

$^{13}\text{C}$  NMR (126 MHz,  $\text{CDCl}_3$ )  $\delta$  162.65 (d,  $J_{\text{C-F}} = 247.7$  Hz), 143.66, 135.91 (d,  $J_{\text{C-F}} = 3.3$  zHz), 132.55, 132.24, 132.21, 131.99, 128.11, 128.06, 128.00, 127.47, 126.59, 115.89 (d,  $J_{\text{C-F}} = 21.9$  Hz), 39.19.

$^{19}\text{F}$ -NMR (471MHz,  $\text{CDCl}_3$ )  $\delta$  -113.2

HRMS  $m/z$  calculated for  $[\text{M}+\text{Na}]^+$   $\text{C}_{15}\text{H}_{10}\text{FNNaO}_2\text{S}$  310.0314 found 310.0319

### 2-(2-chlorophenyl)-3-nitro-2H-thiochromene (3d)

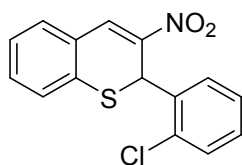

44mg, 72% in 0.2 mmol scale

$^1\text{H}$  NMR (500 MHz, Chloroform-*d*)  $\delta$  8.31 (s, 1H), 7.53 – 7.45 (m, 2H), 7.32 (td,  $J = 7.6, 1.4$  Hz, 1H), 7.27 – 7.18 (m, 4H), 7.09 (dd,  $J = 10.2, 8.2$  Hz, 1H), 6.99 – 6.85 (m, 2H), 5.90 (s, 1H).

$^{13}\text{C}$  NMR (126 MHz,  $\text{CDCl}_3$ )  $\delta$  142.05, 133.38, 132.53, 132.50, 132.24, 132.11, 130.13, 130.07, 128.10, 127.56, 127.05, 127.03, 126.54, 124.35, 124.32, 116.24, 116.07, 32.84, 32.80.

HRMS  $m/z$  calculated for  $[\text{M}+\text{Na}]^+$   $\text{C}_{15}\text{H}_{10}\text{ClNNaO}_2\text{S}$  326.0018 found 326.0025

### 2-(4-chlorophenyl)-3-nitro-2H-thiochromene (3e)

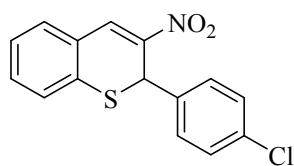

22mg, 36% in 0.2 mmol scale

$^1\text{H}$  NMR (500 MHz, Chloroform-*d*)  $\delta$  8.13 (s, 1H), 7.38 (d,  $J = 7.5$  Hz, 2H), 7.25 (t,  $J = 7.6$  Hz, 1H), 7.17 (d,  $J = 8.9$  Hz, 4H), 7.10 (d,  $J = 8.5$  Hz, 2H), 7.03 (d,  $J = 8.5$  Hz, 2H), 5.41 (s, 1H).

$^{13}\text{C}$  NMR (126 MHz,  $\text{CDCl}_3$ )  $\delta$  143.37, 138.42, 134.40, 132.60, 132.40, 132.26, 131.86, 129.16, 128.12, 127.61, 127.48, 126.65, 39.27.

HRMS  $m/z$  calculated for  $[\text{M}+\text{Na}]^+$   $\text{C}_{15}\text{H}_{10}\text{ClNNaO}_2\text{S}$  326.0018 found 326.0027

### 2-(4-bromophenyl)-3-nitro-2H-thiochromene (3f)

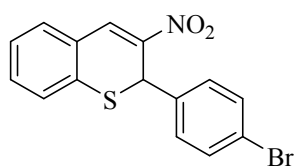

35mg, 51% in 0.2 mmol scale

$^1\text{H}$  NMR (500 MHz, Chloroform-*d*)  $\delta$  8.16 (s, 1H), 7.41 (d,  $J = 7.6$  Hz, 1H), 7.29 (d,  $J = 8.5$  Hz, 3H), 7.20 (d,  $J = 7.3$  Hz, 3H), 7.01 (d,  $J = 8.4$  Hz, 2H), 5.43 (s, 1H).

$^{13}\text{C}$  NMR (126 MHz,  $\text{CDCl}_3$ )  $\delta$  143.29, 138.92, 132.61, 132.43, 132.27, 132.12, 131.83, 128.12, 127.92, 127.49, 126.67, 122.55, 39.34.

HRMS  $m/z$  calculated for  $[\text{M}+\text{Na}]^+$   $\text{C}_{15}\text{H}_{10}\text{BrNNaO}_2\text{S}$  369.9513 found 369.9521

### 2-(2-methoxyphenyl)-3-nitro-2H-thiochromene (3g)

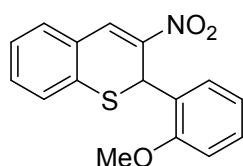

21mg, 35% in 0.2 mmol scale

$^1\text{H}$  NMR (500 MHz, Chloroform-*d*)  $\delta$  8.30 (s, 1H), 7.47 (dd,  $J = 7.5, 1.5$  Hz, 1H), 7.28 (dd,  $J = 7.6, 1.5$  Hz, 1H), 7.24 – 7.13 (m, 3H), 6.91 (dd,  $J = 8.3, 1.0$  Hz, 1H), 6.87 (dd,  $J = 7.6, 1.7$  Hz, 1H), 6.72 (td,  $J = 7.5, 1.1$  Hz, 1H), 6.02 (s, 1H), 3.92 (s, 3H).

$^{13}\text{C}$  NMR (126 MHz,  $\text{CDCl}_3$ )  $\delta$  155.19, 142.74, 133.25, 133.18, 132.15, 132.06, 129.51, 128.32, 127.52, 127.18, 126.31, 126.11, 120.50, 111.21, 55.75, 33.35.

HRMS  $m/z$  calculated for  $[\text{M}+\text{Na}]^+$   $\text{C}_{16}\text{H}_{13}\text{NNaO}_3\text{S}$  322.0514 found 322.0523

### 3-nitro-2-(2-nitrophenyl)-2H-thiochromene (3h)

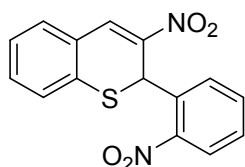

25mg, 40% in 0.2 mmol scale

$^1\text{H}$  NMR (500 MHz, Chloroform-*d*)  $\delta$  8.37 (s, 1H), 8.22 – 8.01 (m, 1H), 7.60 – 7.47 (m, 1H), 7.46 – 7.38 (m, 3H), 7.34 (td,  $J$  = 7.6, 1.5 Hz, 1H), 7.30 – 7.23 (m, 2H), 7.21 (d,  $J$  = 7.9 Hz, 1H), 7.16 (dd,  $J$  = 7.0, 2.3 Hz, 1H), 6.44 (s, 1H).

$^{13}\text{C}$  NMR (126 MHz,  $\text{CDCl}_3$ )  $\delta$  145.88, 142.07, 134.49, 134.31, 133.92, 132.89, 132.43, 132.35, 129.15, 127.74, 127.57, 126.73, 126.27, 34.98.

HRMS  $m/z$  calculated for  $[\text{M}+\text{Na}]^+$   $\text{C}_{15}\text{H}_{10}\text{N}_2\text{NaO}_4\text{S}$  337.0259 found 337.0267

### 2-(2-bromophenyl)-3-nitro-2H-thiochromene (3i)

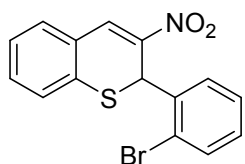

40mg, 58% in 0.2 mmol scale

$^1\text{H}$  NMR (500 MHz, Chloroform-*d*)  $\delta$  8.36 (s, 1H), 7.69 – 7.58 (m, 1H), 7.50 (dd,  $J$  = 7.7, 1.5 Hz, 1H), 7.31 (td,  $J$  = 7.6, 1.5 Hz, 1H), 7.31 – 7.21 (m, 1H), 7.21 (d,  $J$  = 7.7 Hz, 1H), 7.15 – 7.03 (m, 1H), 7.03 – 6.83 (m, 1H), 6.03 (s, 1H).

$^{13}\text{C}$  NMR (126 MHz,  $\text{CDCl}_3$ )  $\delta$  142.57, 137.61, 133.88, 133.78, 132.60, 132.26, 132.09, 129.73, 128.18, 127.89, 127.74, 126.88, 126.58, 122.22, 39.36.

HRMS  $m/z$  calculated for  $[\text{M}+\text{Na}]^+$   $\text{C}_{15}\text{H}_{10}\text{BrNNaO}_2\text{S}$  369.9513 found 369.9521

### 6-chloro-3-nitro-2-phenyl-2H-thiochromene (3j)

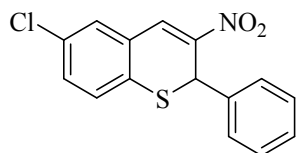

27mg, 45% in 0.2 mmol scale

$^1\text{H}$  NMR (500 MHz, Chloroform-*d*)  $\delta$  8.14 (s, 1H), 7.46 (d,  $J$  = 1.8 Hz, 1H), 7.28 (dd,  $J$  = 8.4, 2.0 Hz, 1H), 7.24 (dd,  $J$  = 4.3, 2.2 Hz, 3H), 7.18 (dd,  $J$  = 11.5, 6.0 Hz, 3H), 5.55 (s, 1H).

$^{13}\text{C}$  NMR (126 MHz,  $\text{CDCl}_3$ )  $\delta$  144.66, 139.39, 132.11, 132.07, 131.31, 130.97, 130.51, 129.70, 129.09, 128.72, 128.55, 126.21, 39.85.

HRMS  $m/z$  calculated for  $[\text{M}+\text{Na}]^+$  326.0018 found 326.0026

### 6-chloro-2-(4-chlorophenyl)-3-nitro-2H-thiochromene (3k)

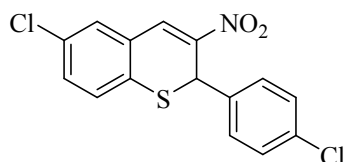

35mg, 52% in 0.2 mmol scale

$^1\text{H}$  NMR (500 MHz, Chloroform-*d*)  $\delta$  8.15 (s, 1H), 7.48 (d,  $J = 1.7$  Hz, 1H), 7.31 (dd,  $J = 8.4, 1.8$  Hz, 1H), 7.21 (dd,  $J = 8.3, 2.9$  Hz, 3H), 7.12 (d,  $J = 8.4$  Hz, 2H), 5.52 (s, 1H).

$^{13}\text{C}$  NMR (126 MHz,  $\text{CDCl}_3$ )  $\delta$  144.34, 137.84, 134.65, 132.32, 132.29, 131.40, 131.15, 130.10, 129.55, 129.27, 128.62, 127.60, 39.26.

HRMS  $m/z$  calculated for  $[\text{M}+\text{Na}]^+$   $\text{C}_{15}\text{H}_9\text{Cl}_2\text{NNaO}_2\text{S}$  359.9629 found 359.9633

### 6-chloro-2-(4-methoxyphenyl)-3-nitro-2H-thiochromene (3l)

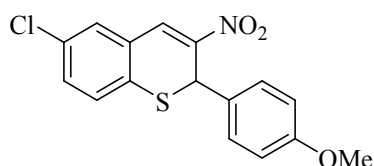

32mg, 48% in 0.2 mmol scale

$^1\text{H}$  NMR (500 MHz, Chloroform-*d*)  $\delta$  8.10 (s, 1H), 7.57 – 7.36 (m, 2H), 7.33 – 7.23 (m, 2H), 7.19 (d,  $J = 8.4$  Hz, 1H), 7.08 (d,  $J = 8.6$  Hz, 2H), 6.74 (d,  $J = 8.6$  Hz, 2H), 5.50 (s, 1H), 3.72 (s, 3H).

$^{13}\text{C}$  NMR (126 MHz,  $\text{CDCl}_3$ )  $\delta$  159.88, 144.93, 132.02, 131.96, 131.60, 131.23, 130.60, 129.67, 128.62, 127.48, 114.42, 55.28, 39.40.

HRMS  $m/z$  calculated for  $[\text{M}+\text{Na}]^+$   $\text{C}_{16}\text{H}_{12}\text{ClNaO}_3\text{S}$  356.0124 found 356.0131

### 6-chloro-3-nitro-2-(3,4,5-trimethoxyphenyl)-2H-thiochromene (3m)

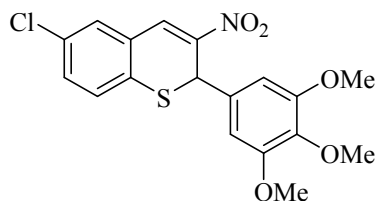

33mg, 42% in 0.2 mmol scale

$^1\text{H}$  NMR (500 MHz, Chloroform-*d*)  $\delta$  8.14 (s, 1H), 7.48 (t,  $J = 4.6$  Hz, 1H), 7.32 (dd,  $J = 8.4, 2.2$  Hz, 1H), 7.25 (d,  $J = 7.7$  Hz, 3H), 6.39 (s, 2H), 5.51 (s, 1H), 3.78 (s, 3H), 3.71 (s, 6H).

$^{13}\text{C}$  NMR (126 MHz,  $\text{CDCl}_3$ )  $\delta$  153.50, 144.80, 138.49, 134.81, 132.15, 131.03, 130.70, 130.66, 129.66, 128.64, 103.41, 60.79, 56.09, 40.11.

HRMS  $m/z$  calculated for  $[\text{M}+\text{Na}]^+$   $\text{C}_{18}\text{H}_{16}\text{ClNNaO}_5\text{S}$  416.0335 found 416.0342

### 7-methoxy-3-nitro-2-phenyl-2H-thiochromene (3n)

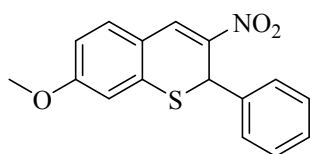

37mg, 62% in 0.2 mmol scale

$^1\text{H}$  NMR (500 MHz, Chloroform-*d*)  $\delta$  8.21 (s, 1H), 7.40 (d,  $J = 8.1$  Hz, 1H), 7.25 – 7.17 (m, 4H), 6.77 (d,  $J = 7.3$  Hz, 2H), 6.77 (d,  $J = 7.3$  Hz, 2H), 5.54 (s, 1H), 3.81 (s, 3H).

$^{13}\text{C}$  NMR (126 MHz,  $\text{CDCl}_3$ )  $\delta$  162.87, 141.19, 140.33, 134.53, 133.96, 132.45, 128.95, 128.40, 126.24, 121.30, 113.16, 112.21, 77.29, 77.04, 76.79, 55.62, 40.11.

HRMS  $m/z$  calculated for  $[\text{M}+\text{Na}]^+$   $\text{C}_{16}\text{H}_{13}\text{NNaO}_3\text{S}$  322.0514 found 322.0518

### 2-(4-fluorophenyl)-7-methoxy-3-nitro-2H-thiochromene (3o)

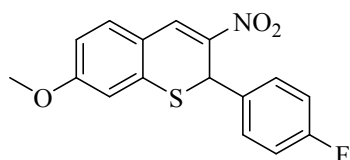

36mg, 57% in 0.2 mmol scale

$^1\text{H}$  NMR (500 MHz, Chloroform-*d*)  $\delta$  8.20 (s, 1H), 7.45 – 7.36 (m, 1H), 7.22 – 7.12 (m, 2H), 6.98 – 6.85 (m, 2H), 6.85 – 6.67 (m, 3H), 5.52 (s, 1H), 3.79 (d,  $J = 27.1$  Hz, 5H).

$^{13}\text{C}$  NMR (126 MHz,  $\text{CDCl}_3$ )  $\delta$  162.97, 162.60 (d,  $J_{\text{C-F}}=246\text{Hz}$ ), 161.62, 141.15, 136.28, 136.25, 134.27, 134.03, 132.41, 128.06, 128.00, 121.13, 115.85 ( $z=21.7\text{Hz}$ ), 113.25, 112.29, 55.64, 39.42.

$^{19}\text{F}$ -NMR (471MHz,  $\text{CDCl}_3$ )  $\delta$  -113.4

HRMS  $m/z$  calculated for  $[\text{M}+\text{Na}]^+$   $\text{C}_{16}\text{H}_{12}\text{FNNaO}_3\text{S}$  340.0420 found 340.0428

### 2-(4-bromophenyl)-7-methoxy-3-nitro-2H-thiochromene (3p)

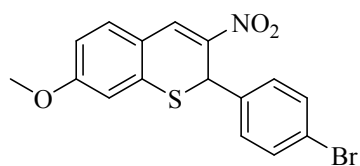

41mg, 55% in 0.2 mmol scale

$^1\text{H}$  NMR (500 MHz, Chloroform-*d*)  $\delta$  8.20 (s, 1H), 7.43 – 7.38 (m, 1H), 7.37 – 7.33 (m, 2H), 7.12 – 7.03 (m, 2H), 6.80 – 6.75 (m, 2H), 5.48 (s, 1H), 3.82 (s, 3H).

$^{13}\text{C}$  NMR (126 MHz,  $\text{CDCl}_3$ )  $\delta$  163.01, 140.75, 139.29, 134.11, 134.07, 132.63, 132.07, 127.95, 122.40, 121.13, 113.31, 112.33, 77.29, 77.04, 76.78, 55.65, 39.57

HRMS  $m/z$  calculated for  $[\text{M}+\text{Na}]^+$   $\text{C}_{16}\text{H}_{12}\text{BrNNaO}_3\text{S}$  399.9619 found 399.9623

### 7-methoxy-3-nitro-2-(3,4,5-trimethoxyphenyl)-2H-thiochromene (3q)

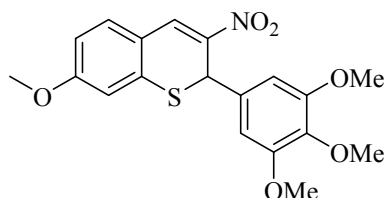

37mg, 48% in 0.2 mmol scale

$^1\text{H}$  NMR (500 MHz, Chloroform-*d*)  $\delta$  8.20 (s, 1H), 7.40 (d,  $J = 8.5$  Hz, 1H), 6.81 (d,  $J = 2.4$  Hz, 1H), 6.77 (dd,  $J = 8.5, 2.5$  Hz, 1H), 6.42 (s, 2H), 5.47 (s, 1H), 3.82 (s, 3H), 3.77 (s, 3H), 3.70 (s, 6H).

$^{13}\text{C}$  NMR (126 MHz,  $\text{CDCl}_3$ )  $\delta$  162.89, 153.39, 141.35, 138.18, 135.76, 134.62, 133.69, 132.25, 121.27, 113.21, 112.33, 103.30, 77.29, 77.04, 76.79, 60.75, 60.39, 56.00, 55.64, 40.39

HRMS  $m/z$  calculated for  $[\text{M}+\text{Na}]^+$   $\text{C}_{19}\text{H}_{19}\text{NNaO}_6\text{S}$  412.0831 found 412.0836

### 2-(3-nitro-2H-thiochromen-2-yl)furan

$^1\text{H}$  NMR (500 MHz, Chloroform-*d*)  $\delta$  8.17 (s, 1H), 7.47 (dd,  $J = 7.7, 1.4$  Hz, 1H), 7.36 – 7.30 (m, 2H), 7.29 – 7.22 (m, 2H), 6.19 (dd,  $J = 3.4, 1.8$  Hz, 1H), 6.05 (d,  $J = 3.3$  Hz, 1H), 5.68 (s, 1H).

$^{13}\text{C}$  NMR (126 MHz,  $\text{CDCl}_3$ )  $\delta$  150.54, 143.18, 141.42, 132.66, 132.30, 132.27, 132.19, 128.21, 127.60, 126.51, 110.68, 107.71, 33.89.

HRMS  $m/z$  calculated for  $[\text{M}+\text{Na}]^+$   $\text{C}_{13}\text{H}_9\text{NNaO}_3\text{S}$  282.0201 found 282.0208



### 3-nitro-2-(thiophen-2-yl)-2H-thiochromene

$^1\text{H}$  NMR (500 MHz, Chloroform-*d*)  $\delta$  8.13 (s, 1H), 7.48 (d,  $J = 7.1$  Hz, 1H), 7.37 (dd,  $J = 6.3, 1.6$  Hz, 2H), 7.31 – 7.24 (m, 1H), 7.10 (dd,  $J = 5.0, 1.3$  Hz, 1H), 6.88 (dt,  $J = 3.6, 1.0$  Hz, 1H), 6.82 (dd,  $J = 5.1, 3.6$  Hz, 1H), 5.84 (s, 1H).

$^{13}\text{C}$  NMR (126 MHz,  $\text{CDCl}_3$ )  $\delta$  143.98, 132.43, 132.23, 131.99, 131.55, 128.20, 127.77, 126.67, 125.58, 125.38, 35.57.

HRMS  $m/z$  calculated for  $[\text{M}+\text{Na}]^+$   $\text{C}_{13}\text{H}_9\text{NNaO}_2\text{S}_2$  297.9972 found 297.9980f

### 2-phenyl-2H-thiochromene-3-carbaldehyde (4)

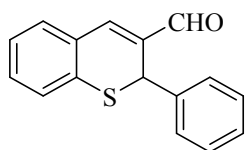

$^1\text{H}$  NMR (500 MHz, Chloroform-*d*)  $\delta$  9.67 (s, 1H), 7.47 (s, 1H), 7.41 (dd,  $J = 7.3, 1.2$  Hz, 1H), 7.31 – 7.27 (m, 1H), 7.18 – 7.21 (m,  $m$  5H), 5.21 (s, 1H).

$^{13}\text{C}$  NMR (126 MHz,  $\text{CDCl}_3$ )  $\delta$  191.1, 145.1, 141.7, 134.8, 134.1, 131.8, 131.0, 129.9, 128.7, 127.8, 127.6, 126.5, 125.9, 38.4.

### phenyl(2-phenyl-2H-thiochromen-3-yl)methanone (5)

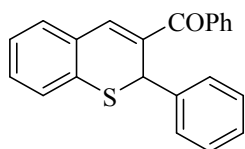

$^1\text{H}$  NMR (500 MHz, Chloroform-*d*)  $\delta$  7.69 (dd,  $J = 8.3, 1.3$  Hz, 1H), 7.58 – 7.52 (m, 1H), 7.45 (dd,  $J = 8.3, 6.8$  Hz, 1H), 7.32 – 7.16 (m, 5H), 7.11 (td,  $J = 7.2, 1.6$  Hz, 1H), 5.48 (s, 1H).

$^{13}\text{C}$  NMR (126 MHz,  $\text{CDCl}_3$ )  $\delta$  195.7, 141.9, 140.0, 138.1, 133.2, 132.7, 131.9, 131.1, 130.8, 130.4, 129.2, 128.7, 128.4, 127.7, 127.6, 126.6, 125.7, 40.2.

### methyl 2-phenyl-2H-thiochromene-3-carboxylate (6)

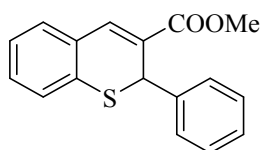

$^1\text{H}$  NMR (500 MHz,  $\text{CDCl}_3$ )  $\delta$  7.84 (s, 1H), 7.25 – 7.15 (m, 5H), 7.08 (t,  $J = 7.9$  Hz, 1H), 7.01 (dd,  $J = 7.6, 0.8$  Hz, 1H), 6.81 (dd,  $J = 8.1, 0.9$  Hz, 1H), 5.23 (s, 1H), 4.10 – 3.91 (m, 2H), 3.78 (s, 3H)

$^{13}\text{C}$  NMR (126 MHz,  $\text{CDCl}_3$ )  $\delta$  165.38, 153.84, 141.53, 136.03, 129.92, 127.51, 126.51, 125.70, 124.18, 123.72, 122.14, 120.57, 112.61, 63.50, 51.23, 38.56.

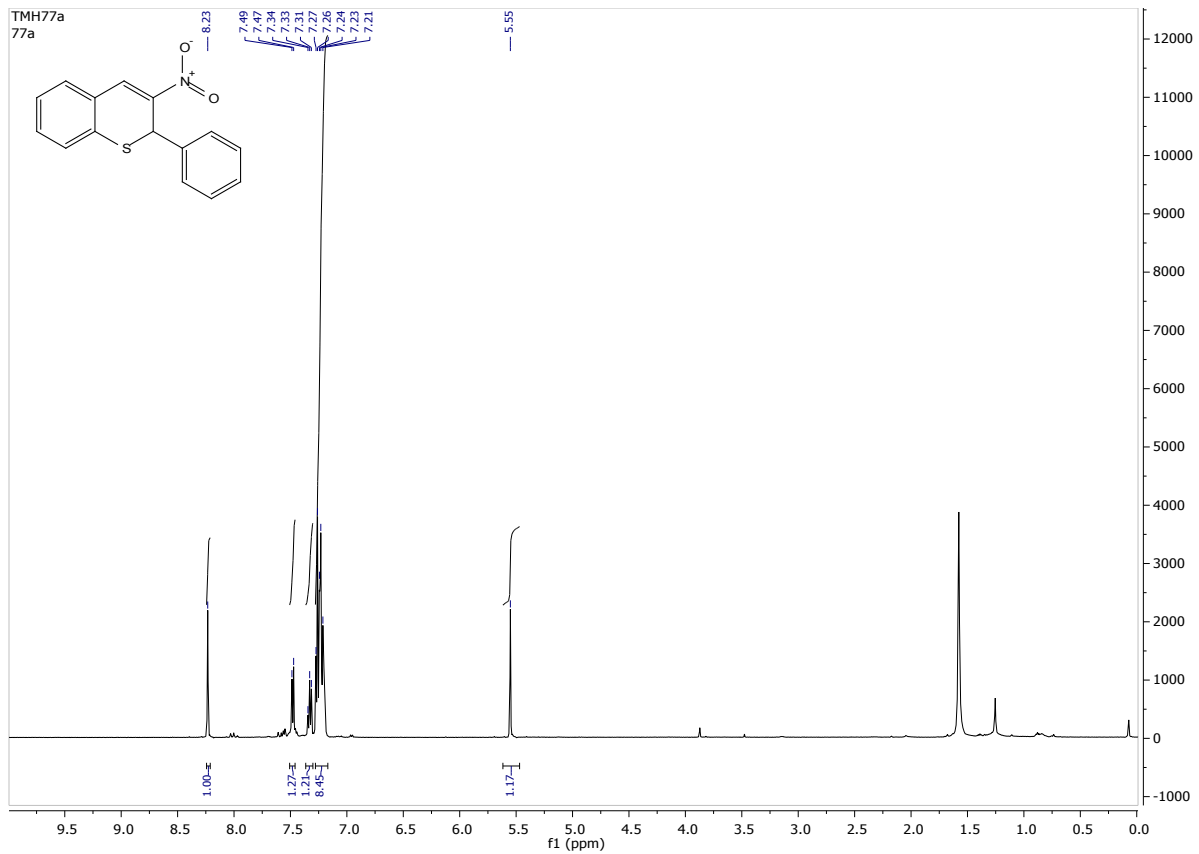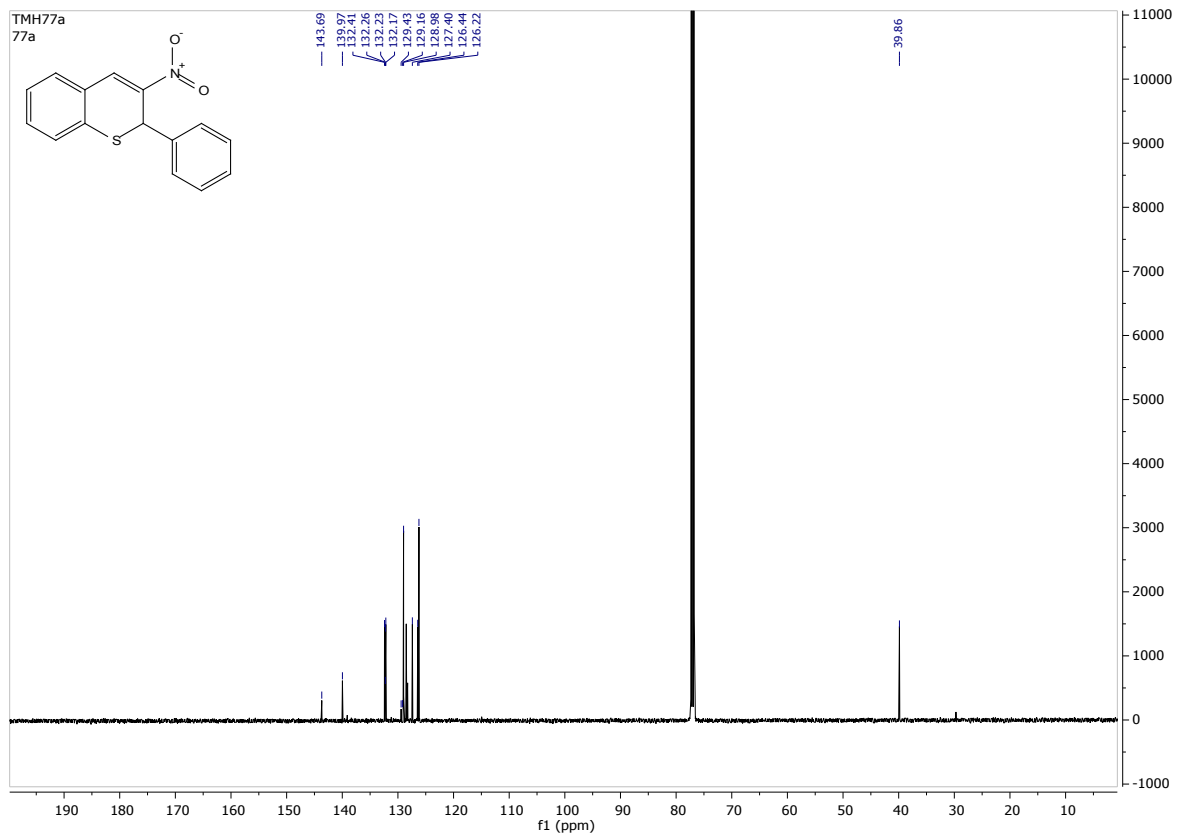

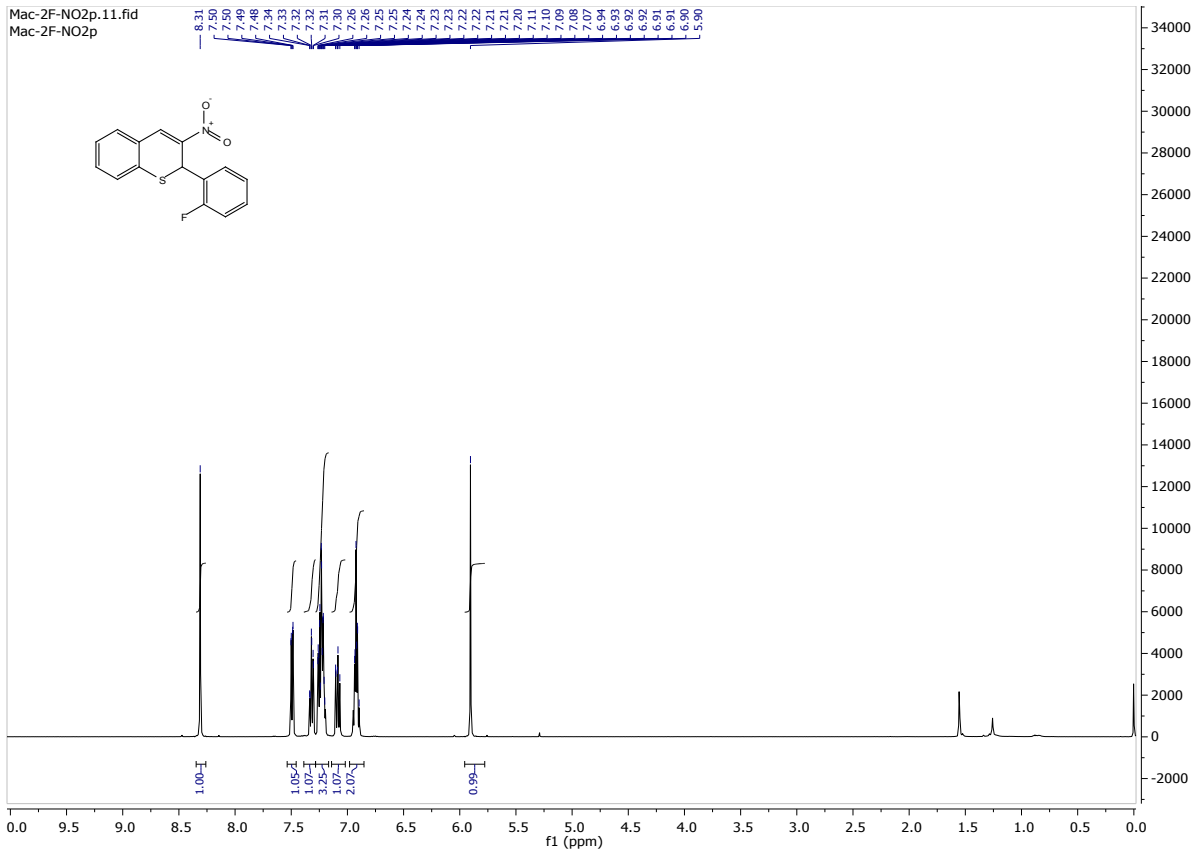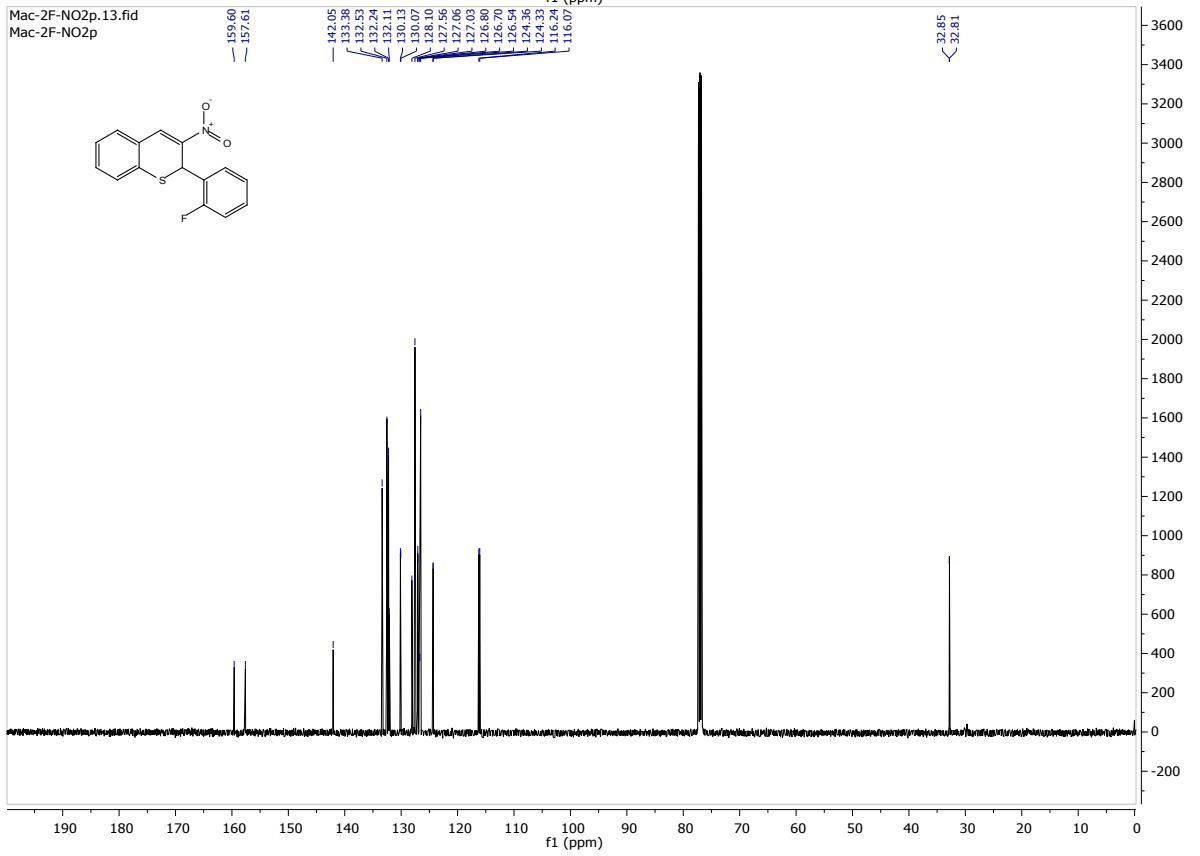

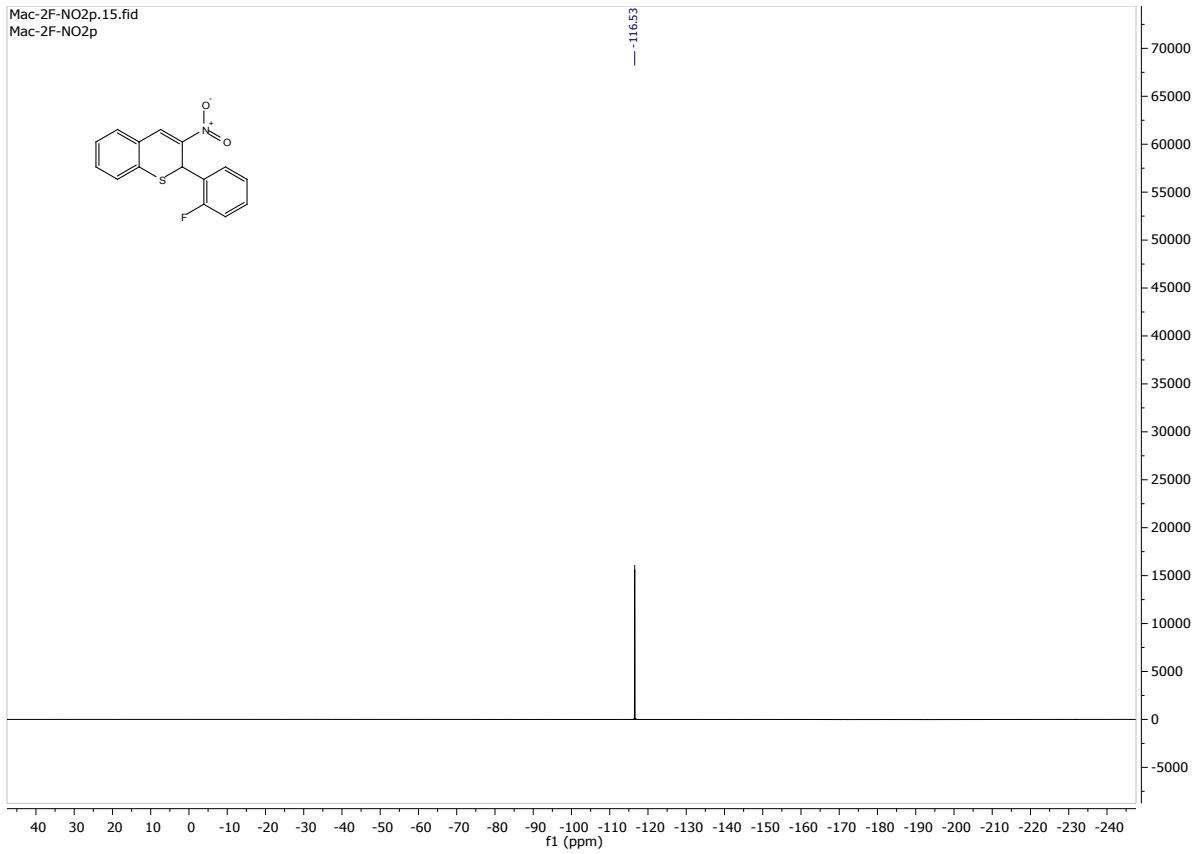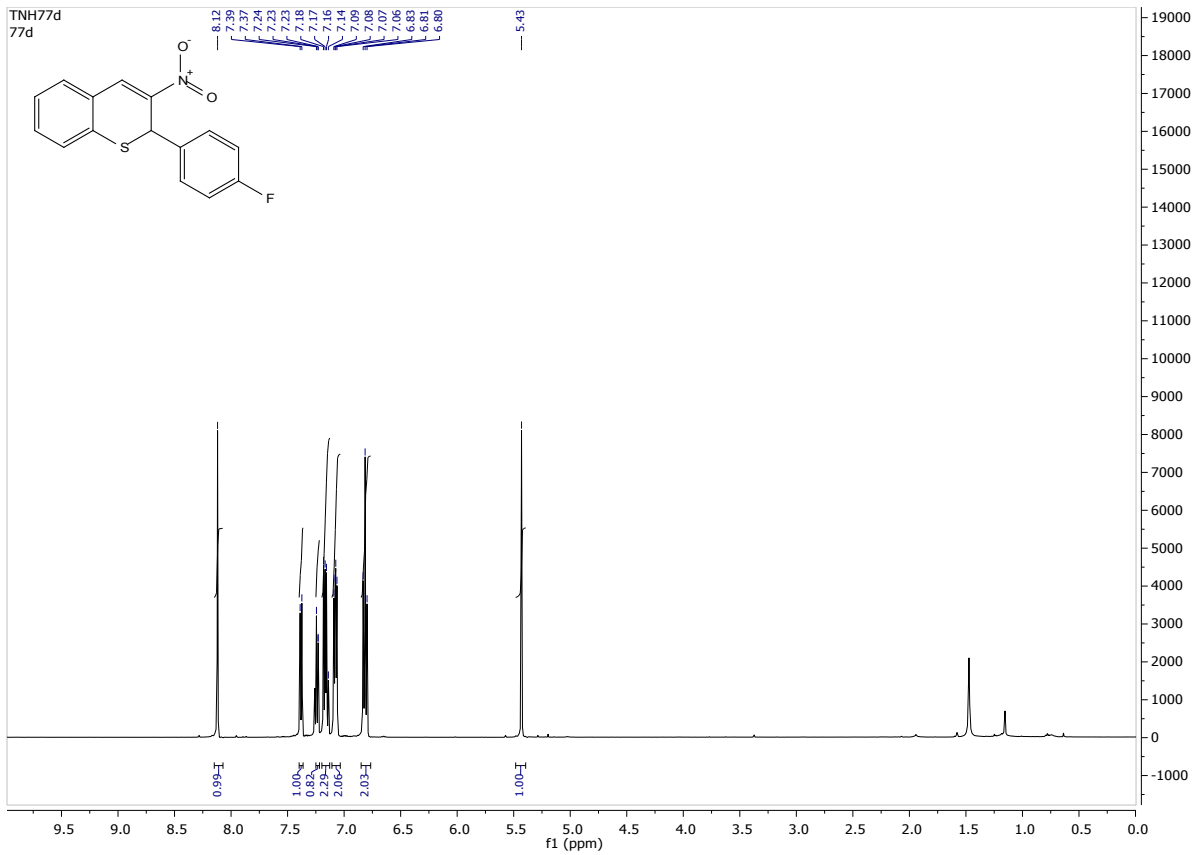

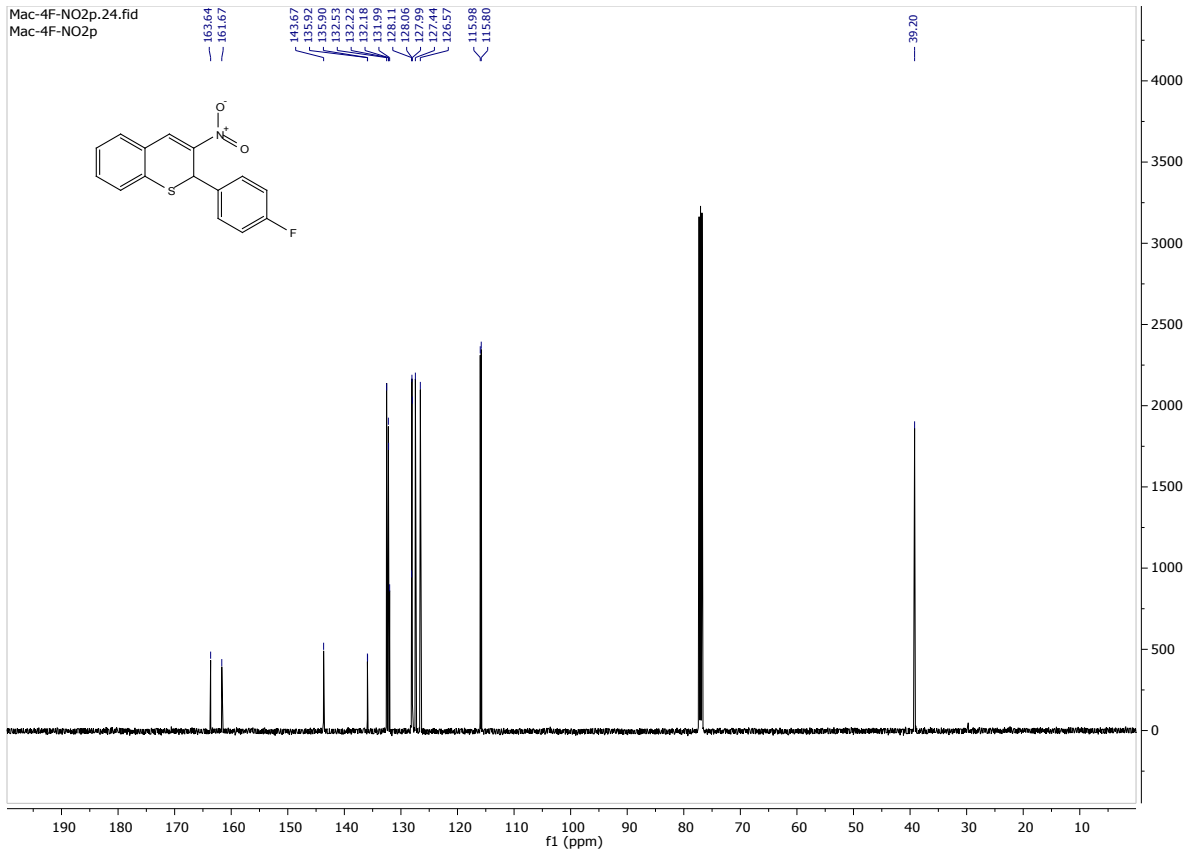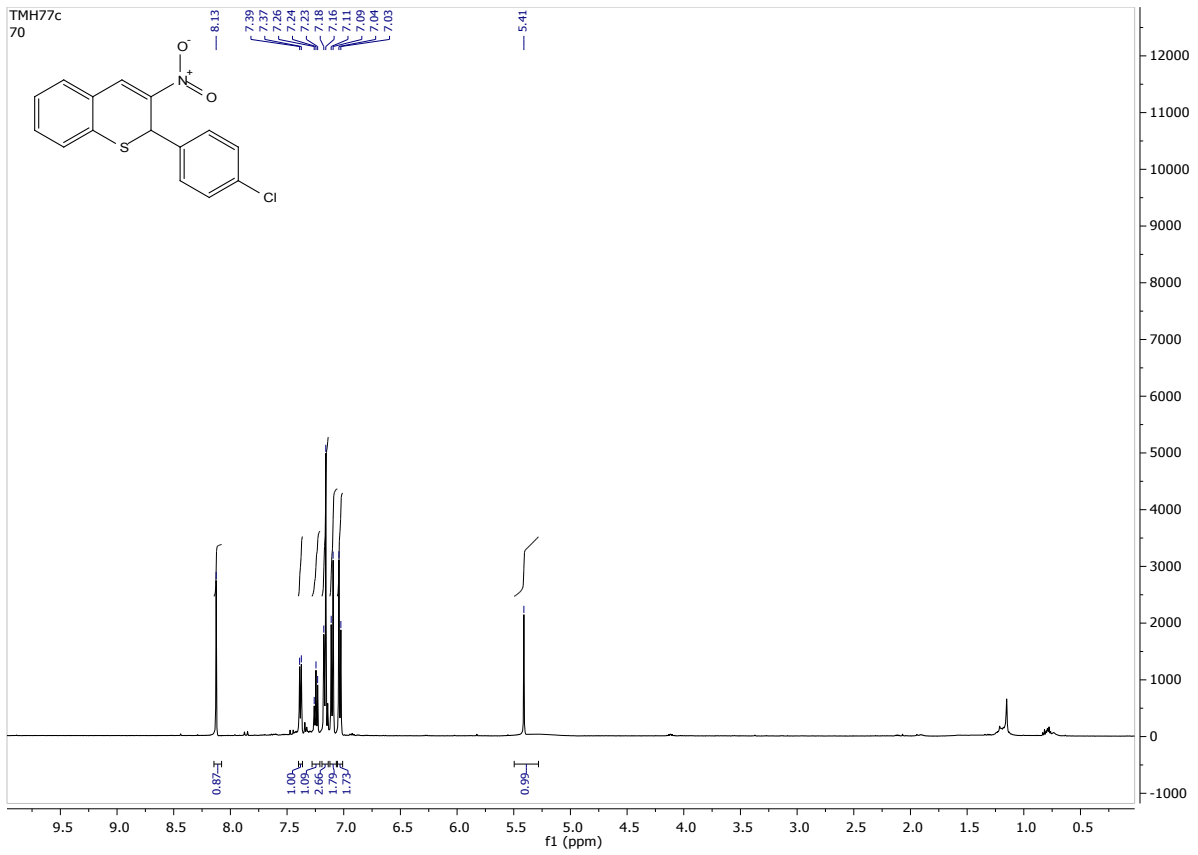

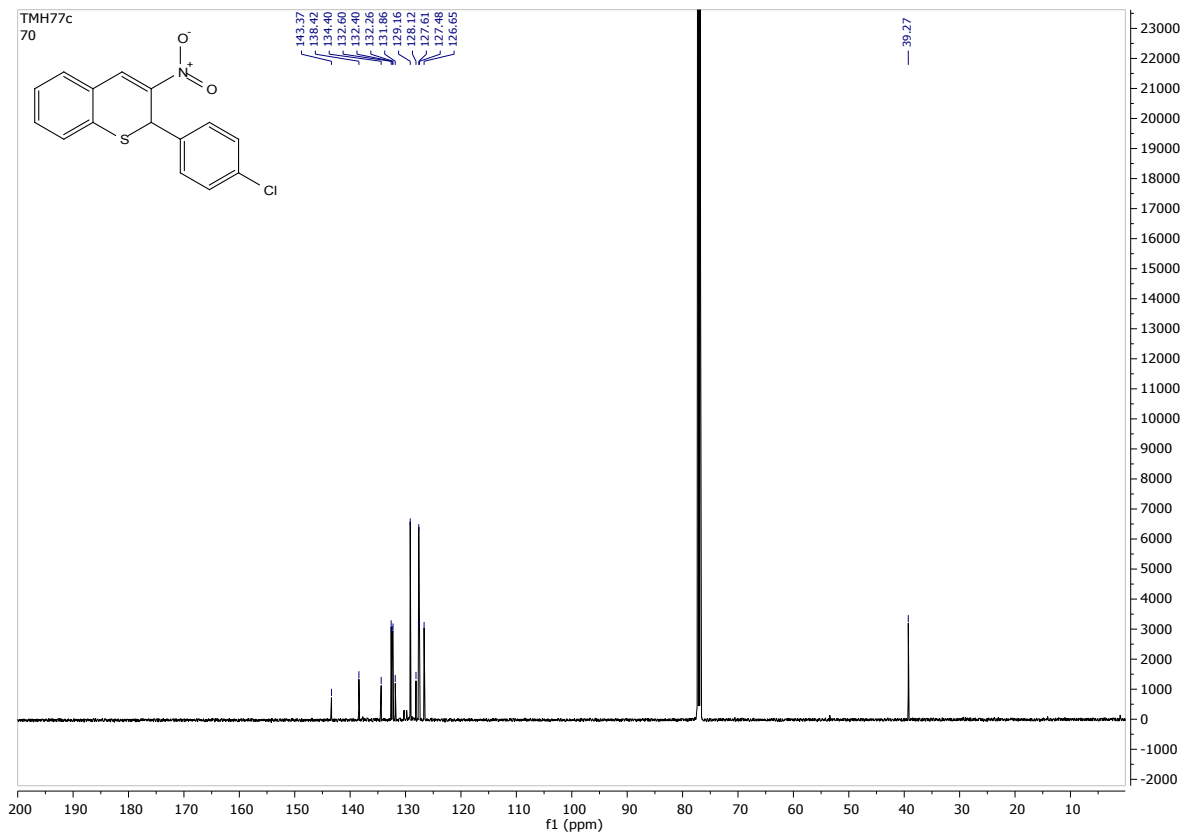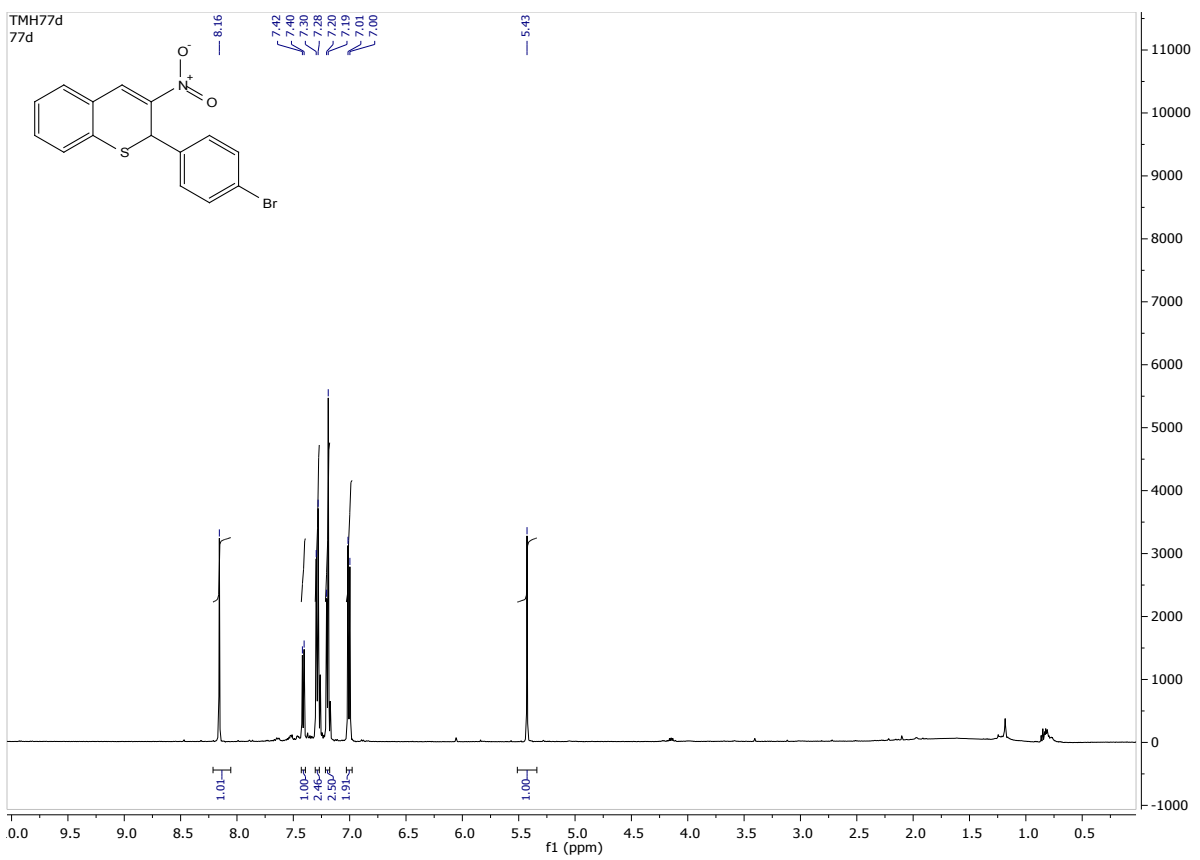

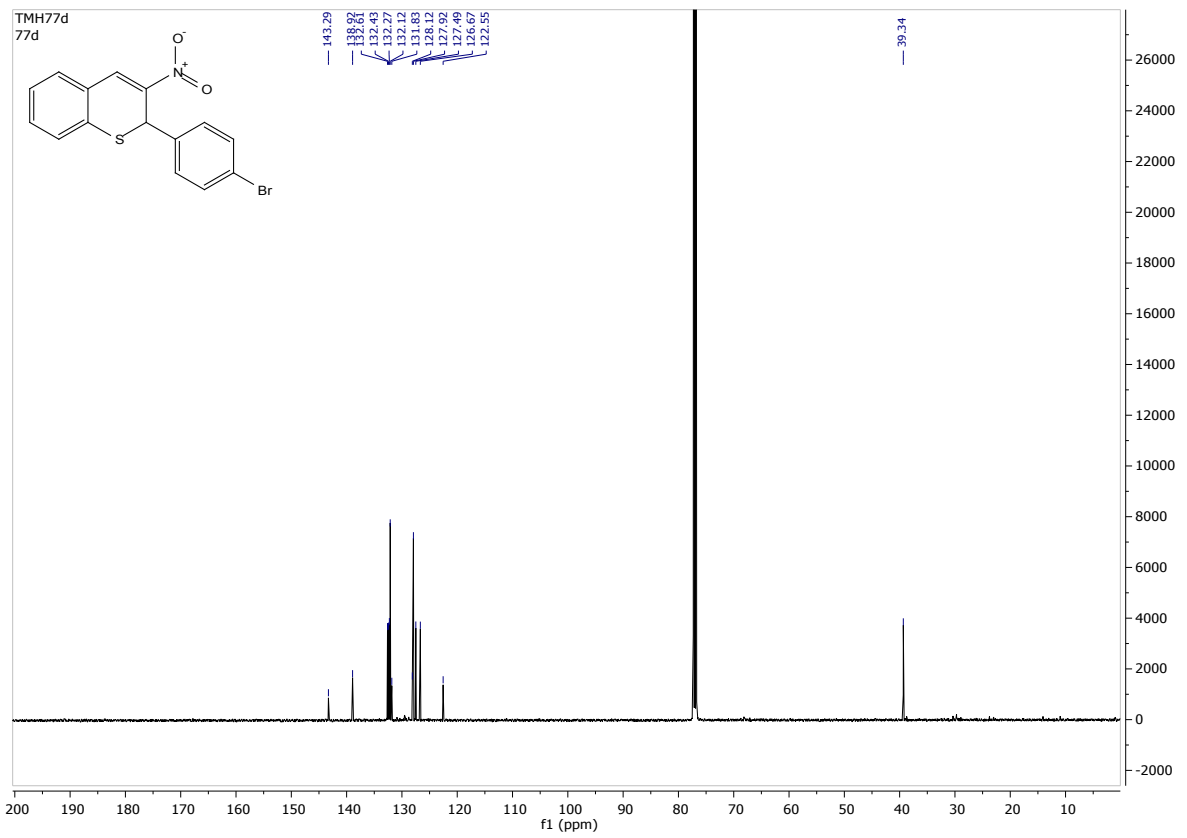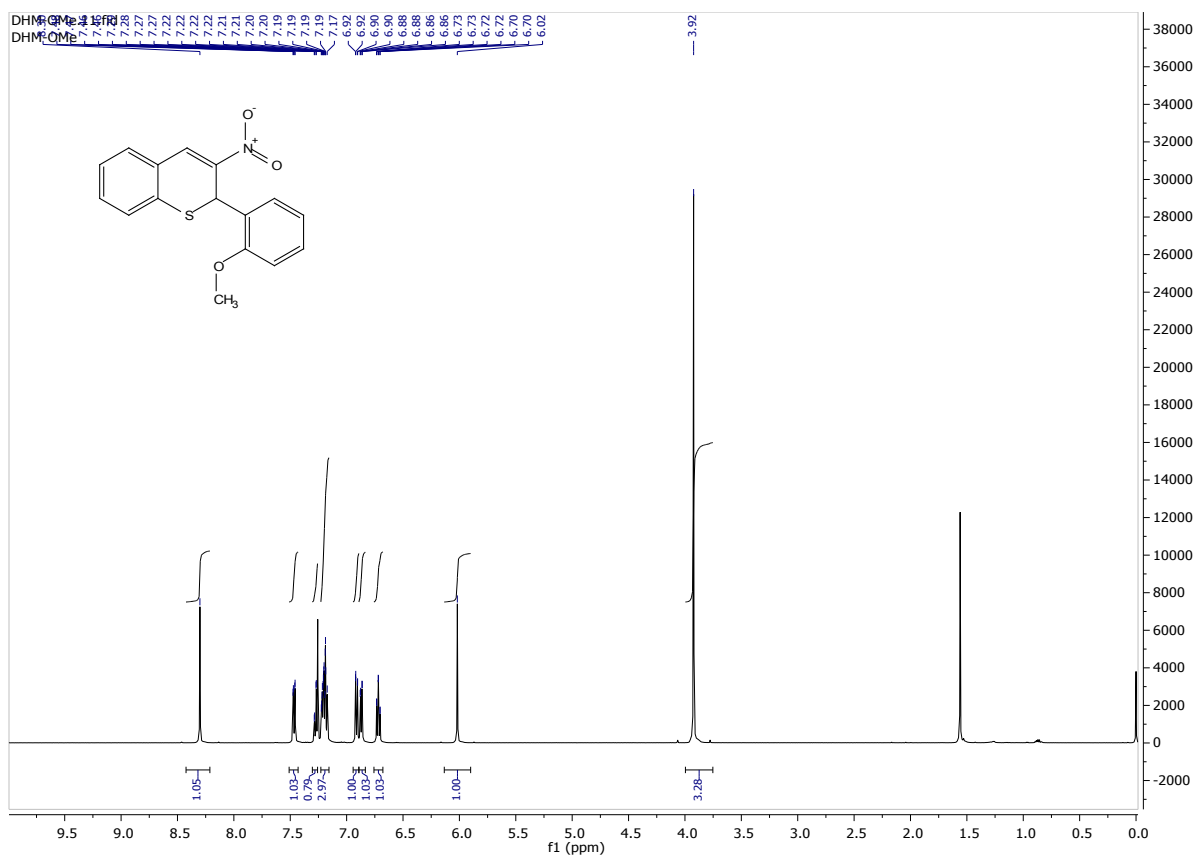



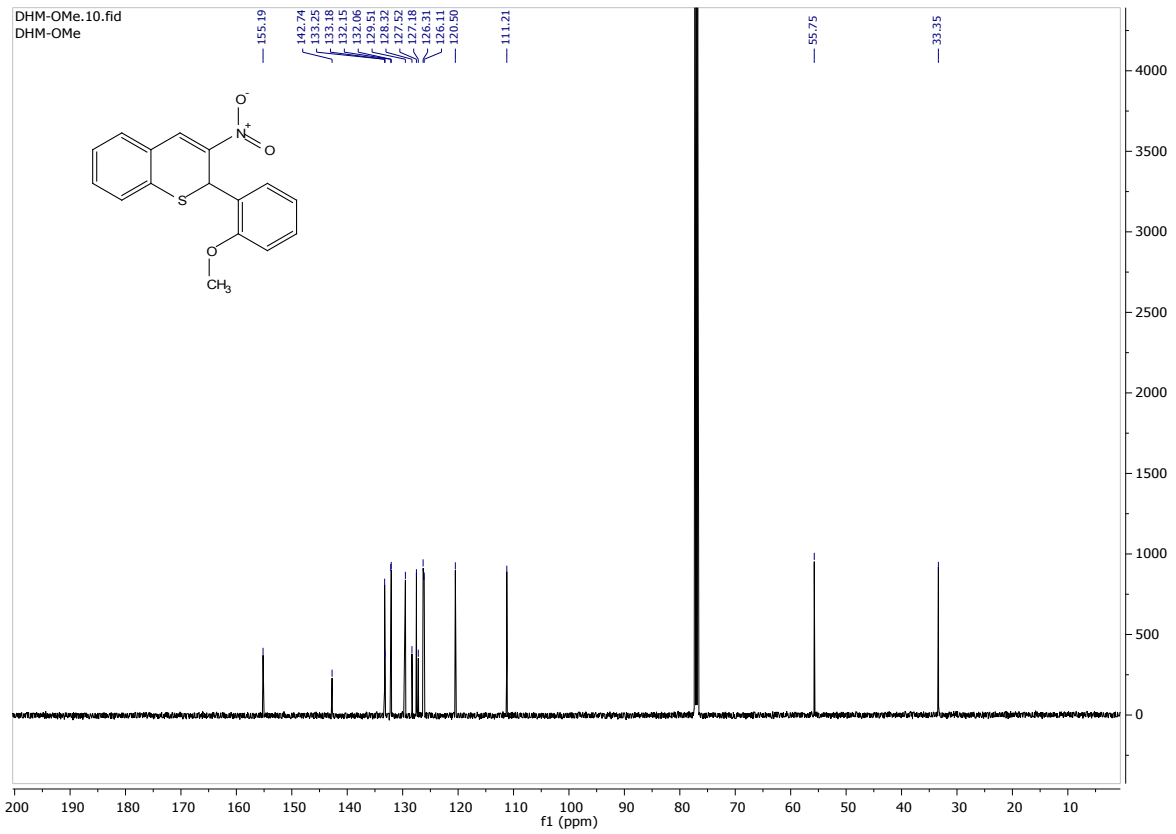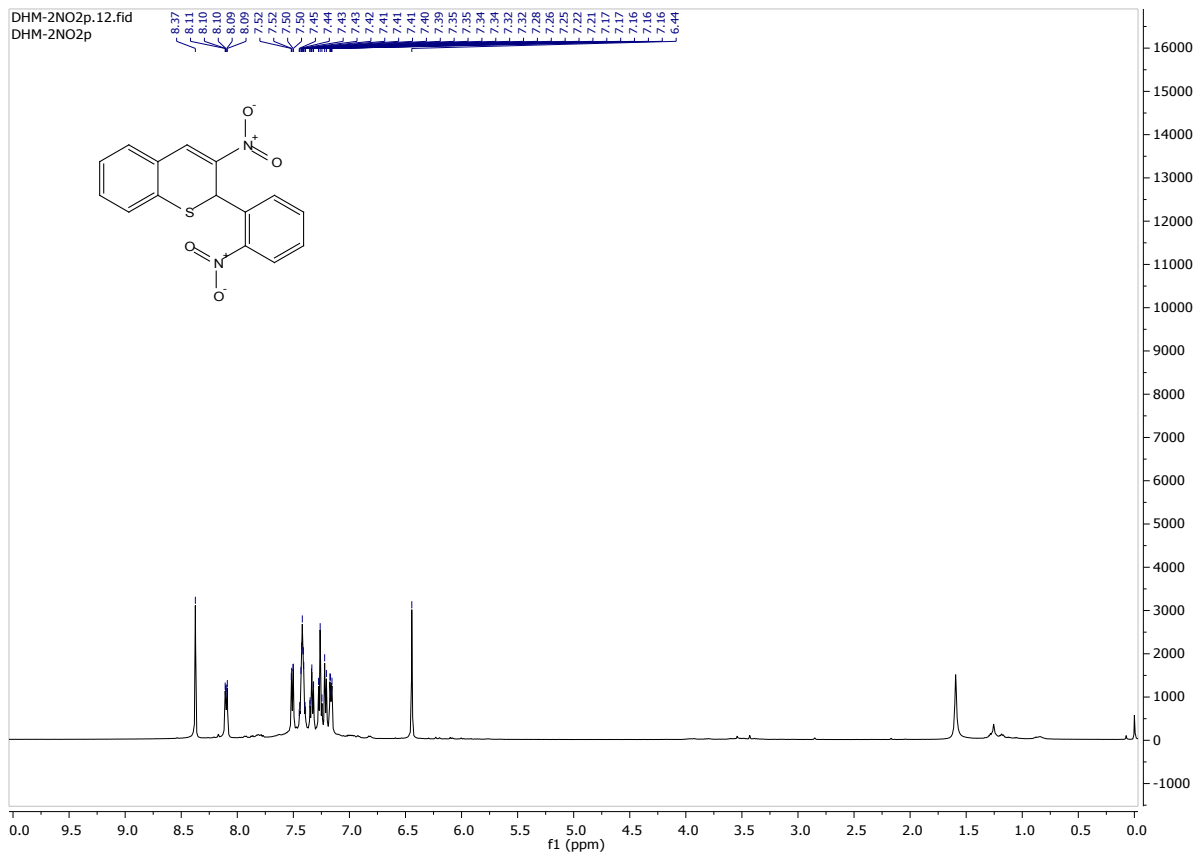

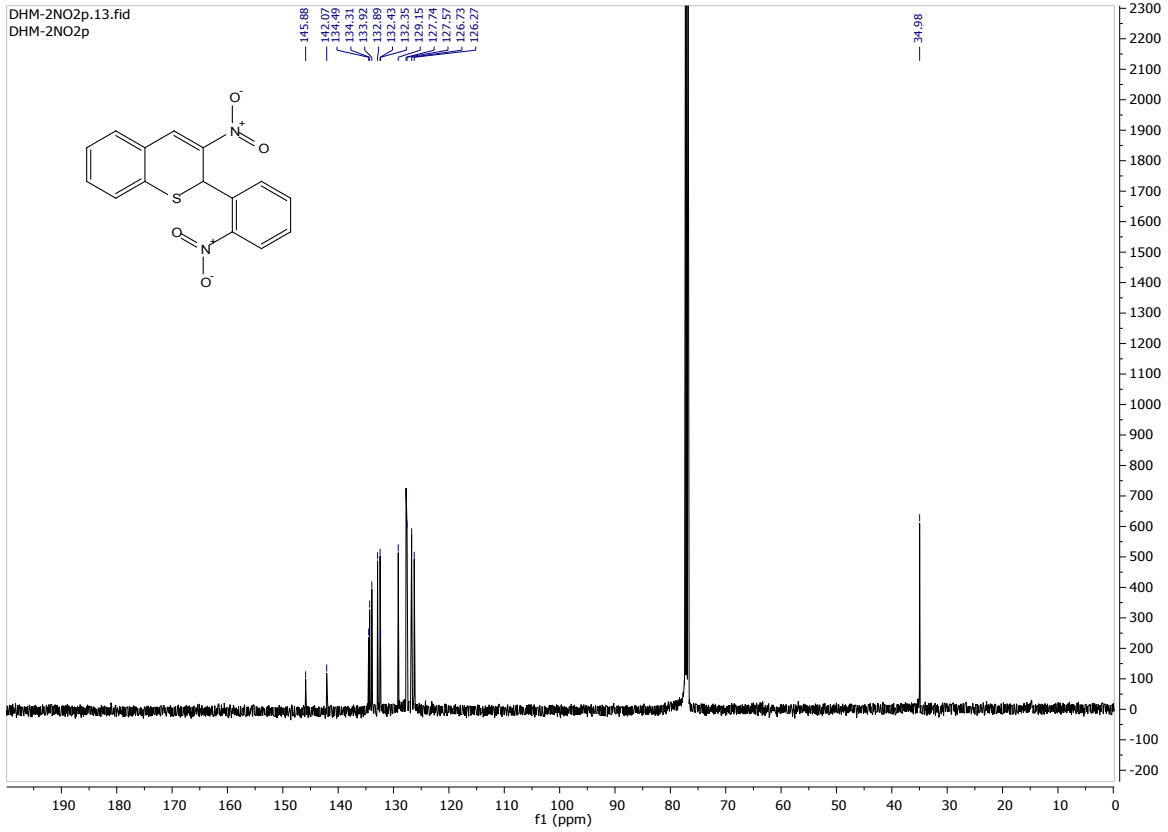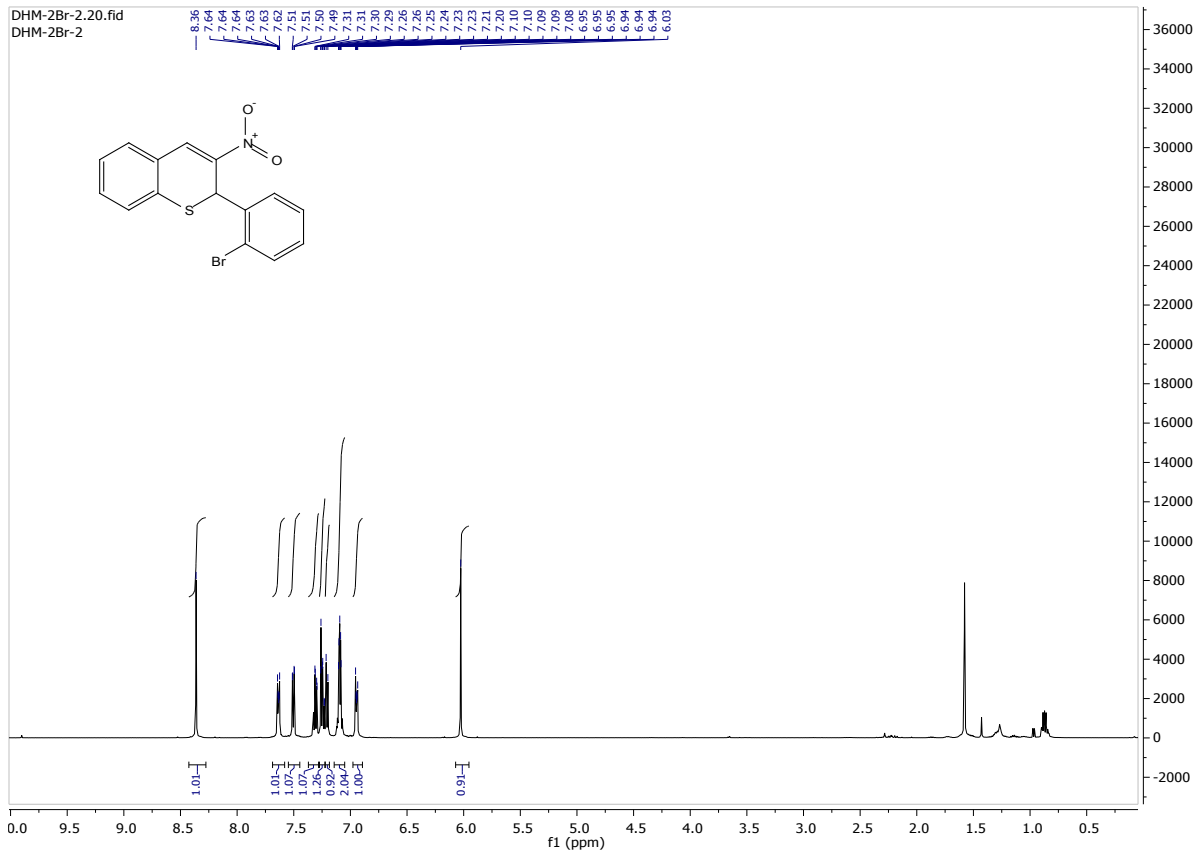

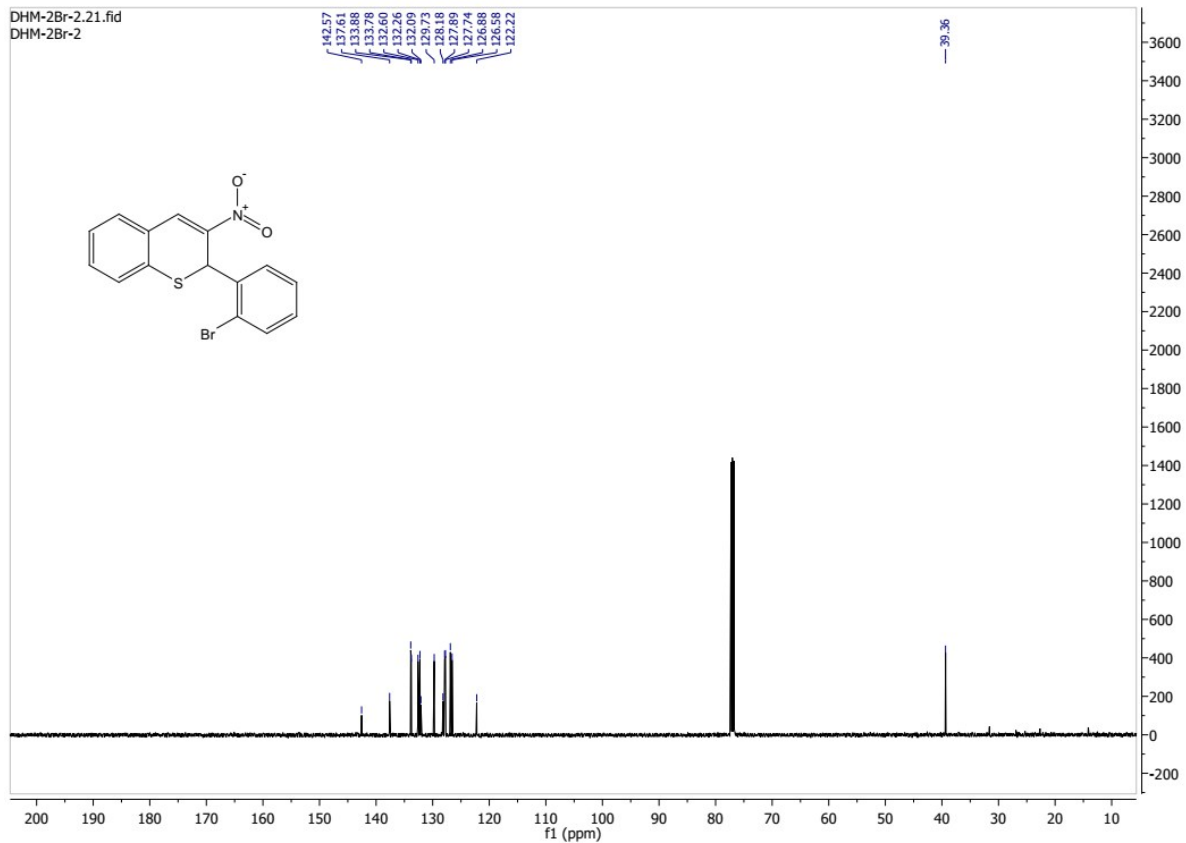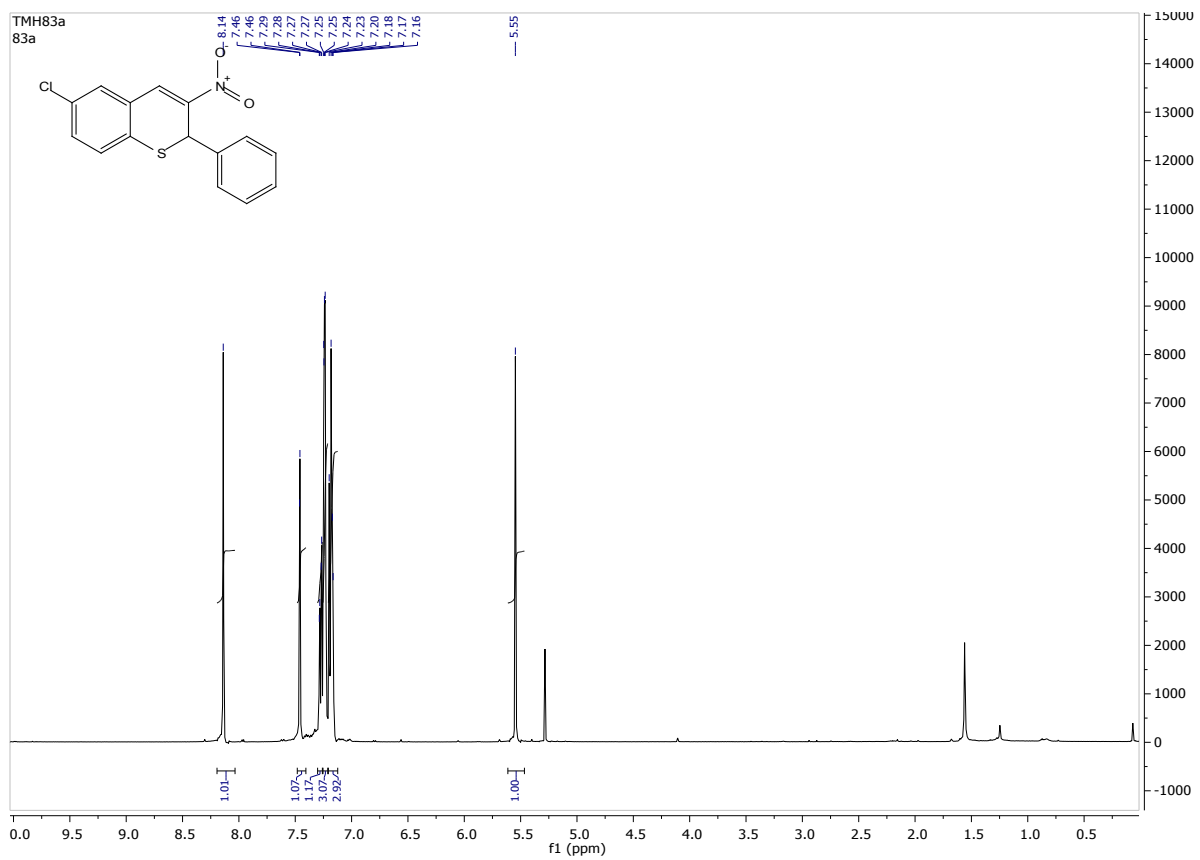

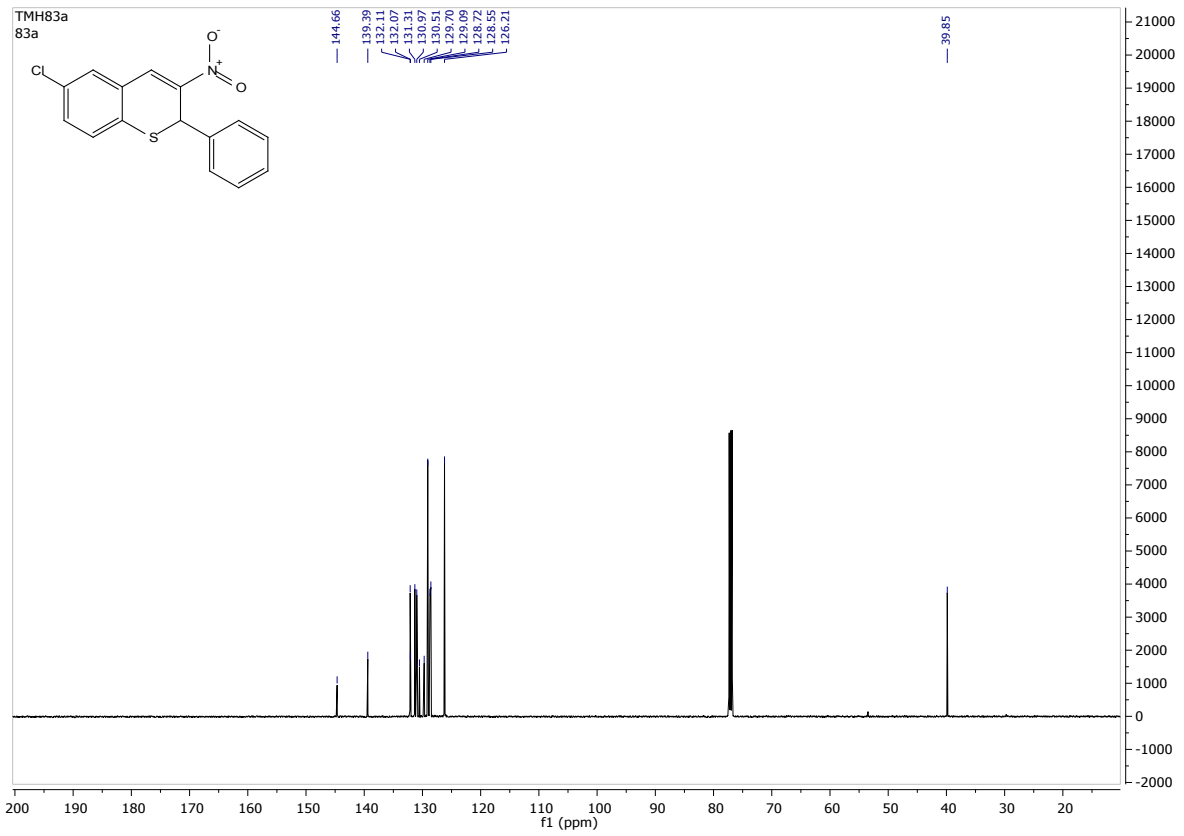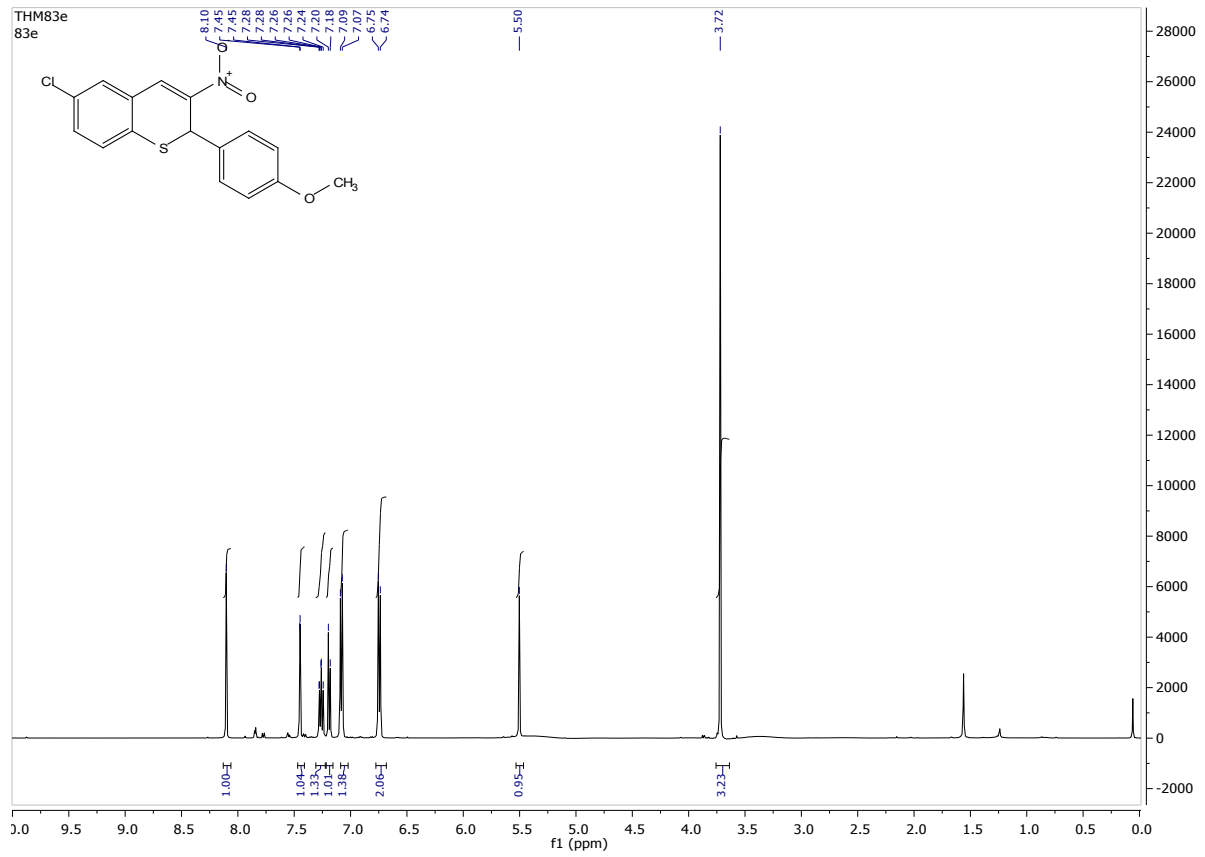

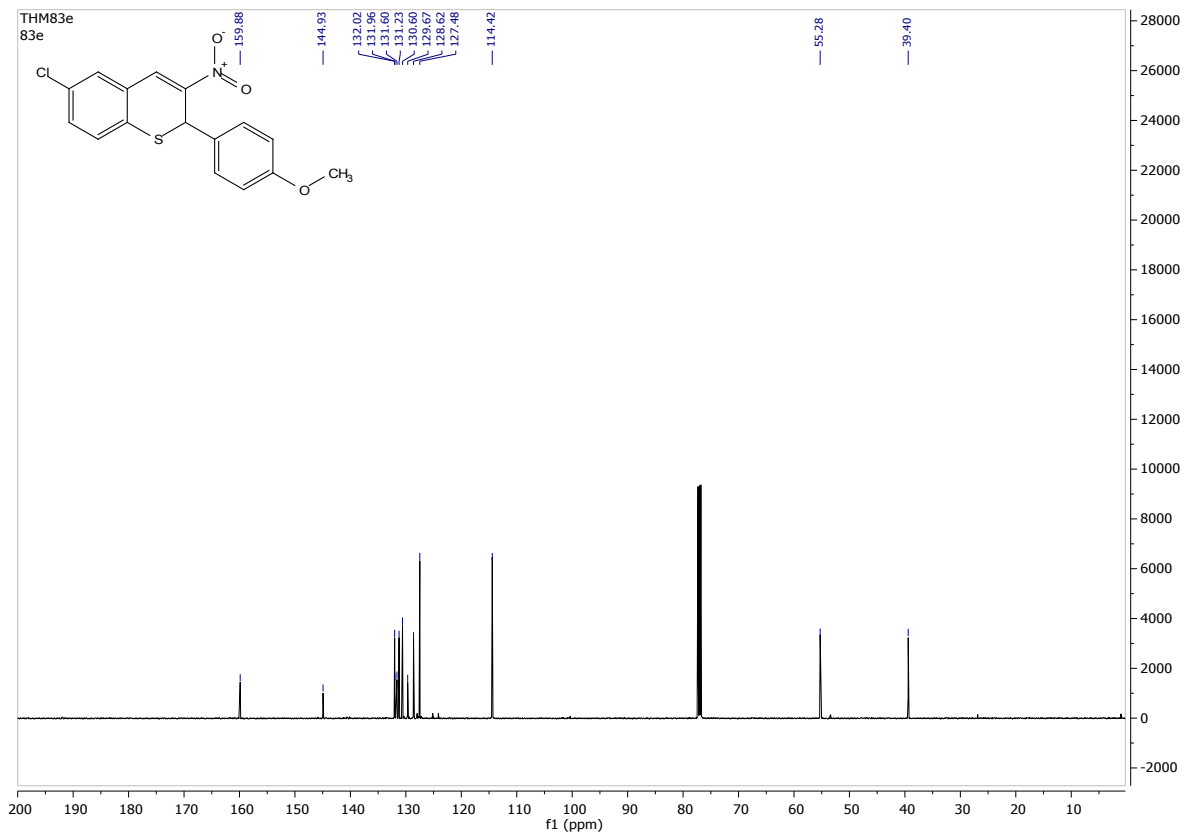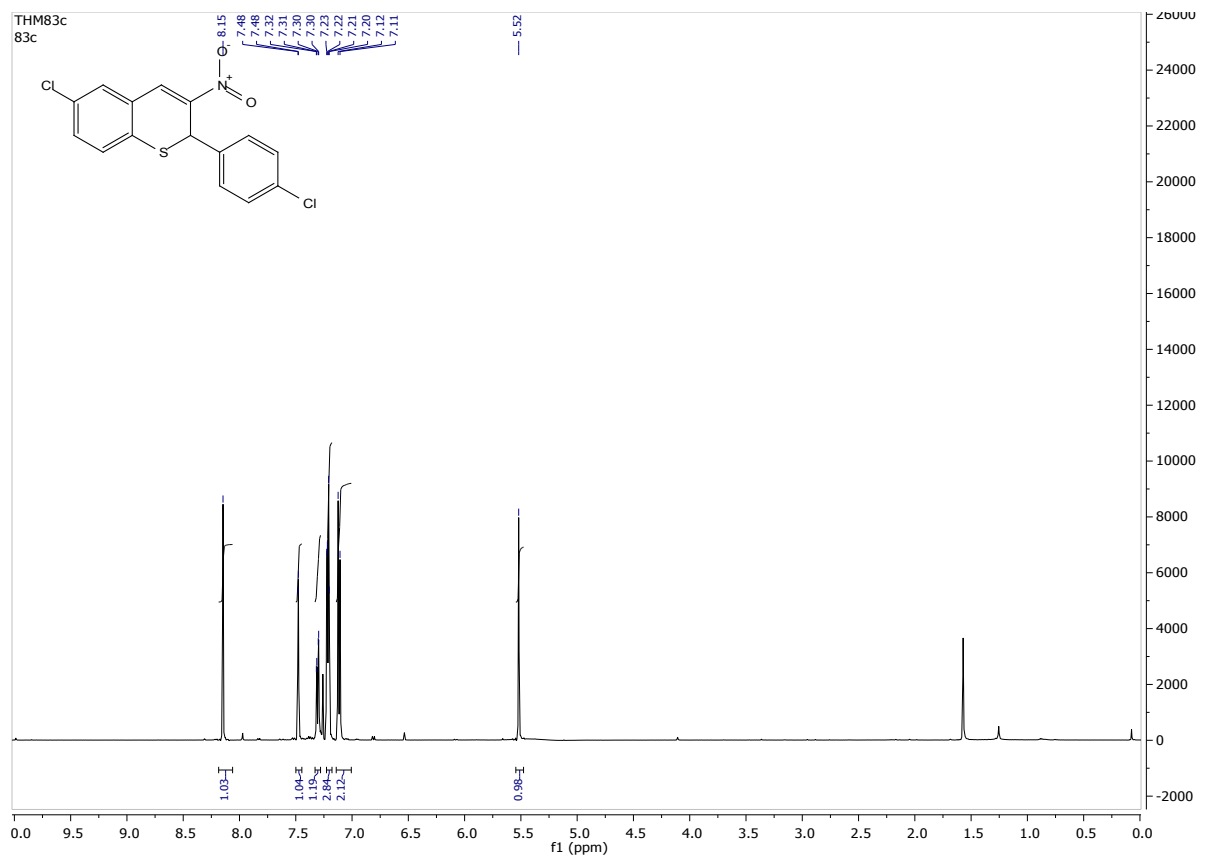

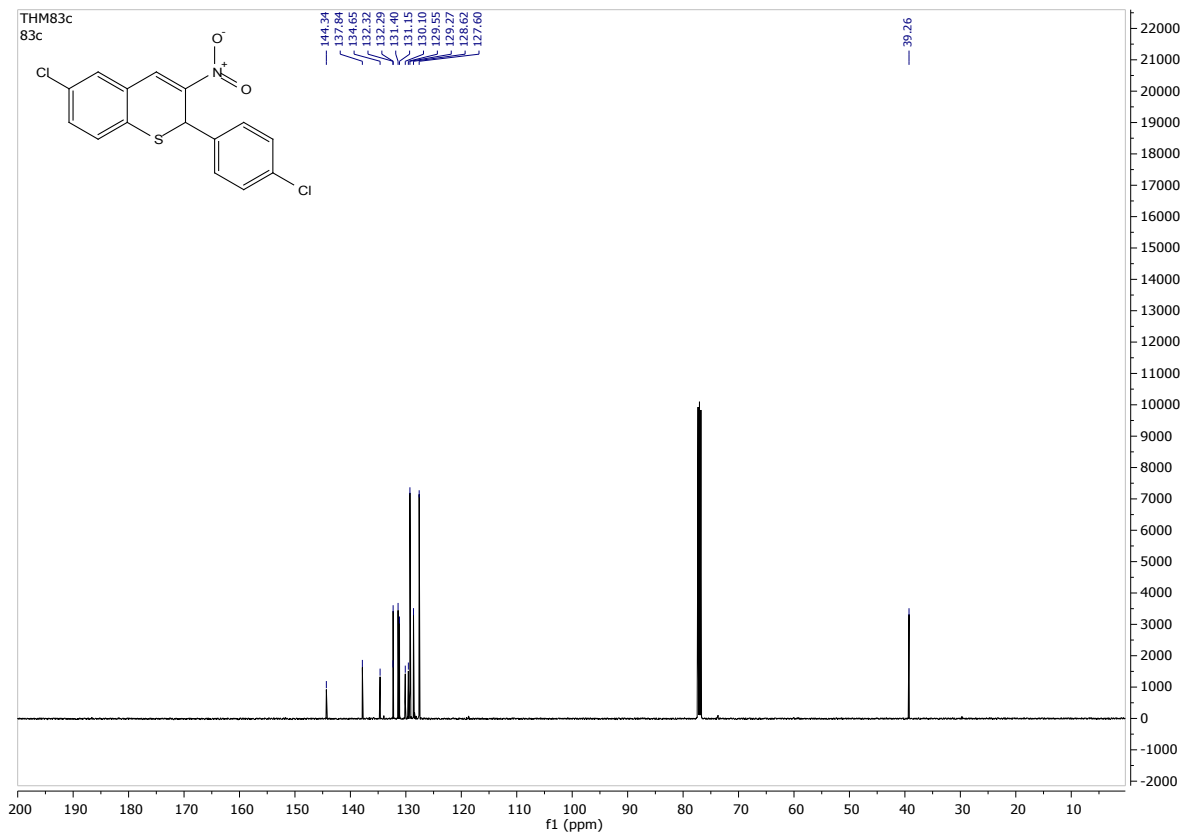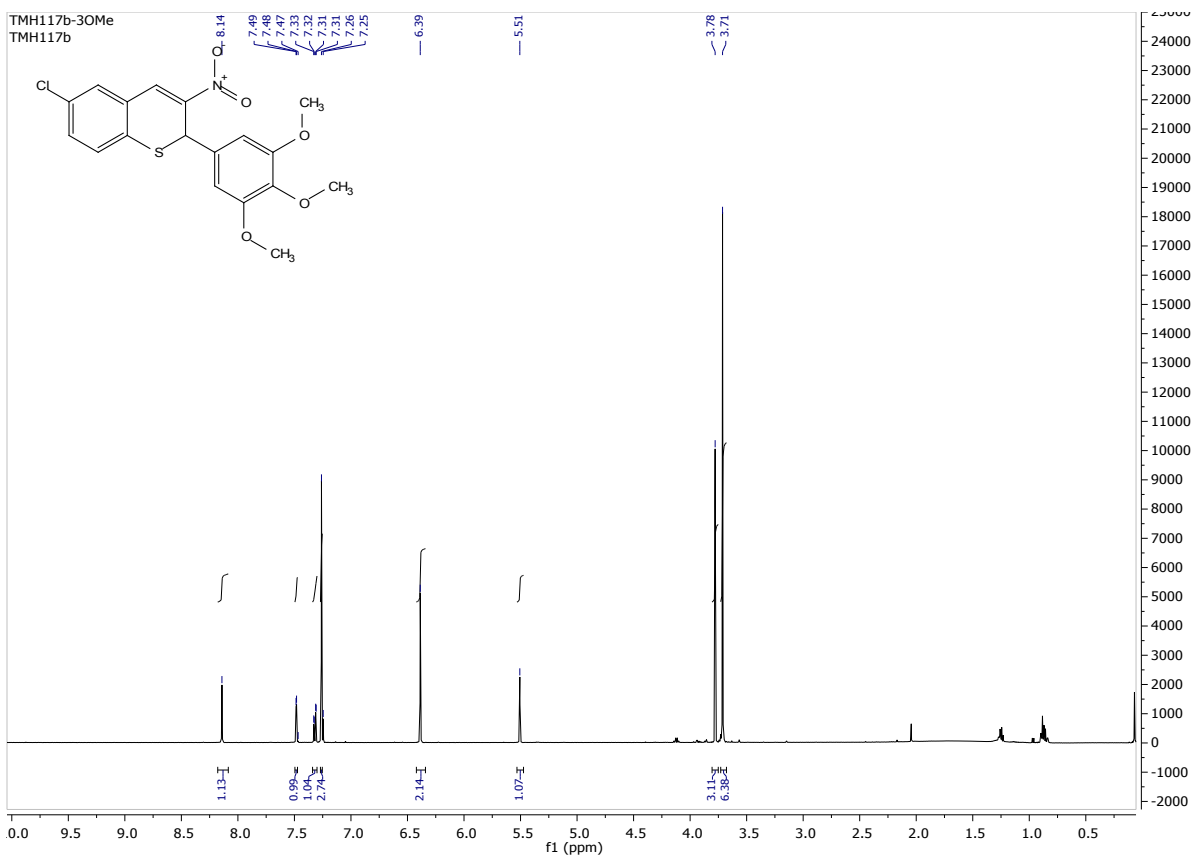

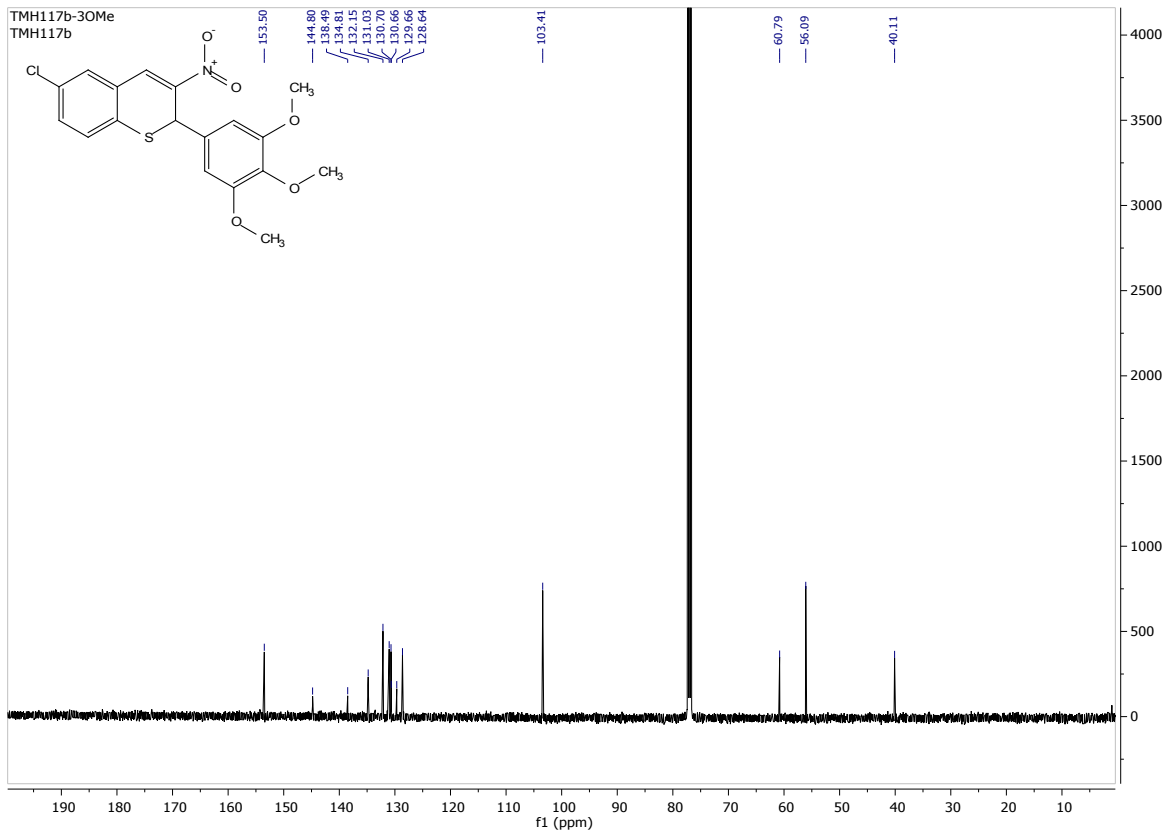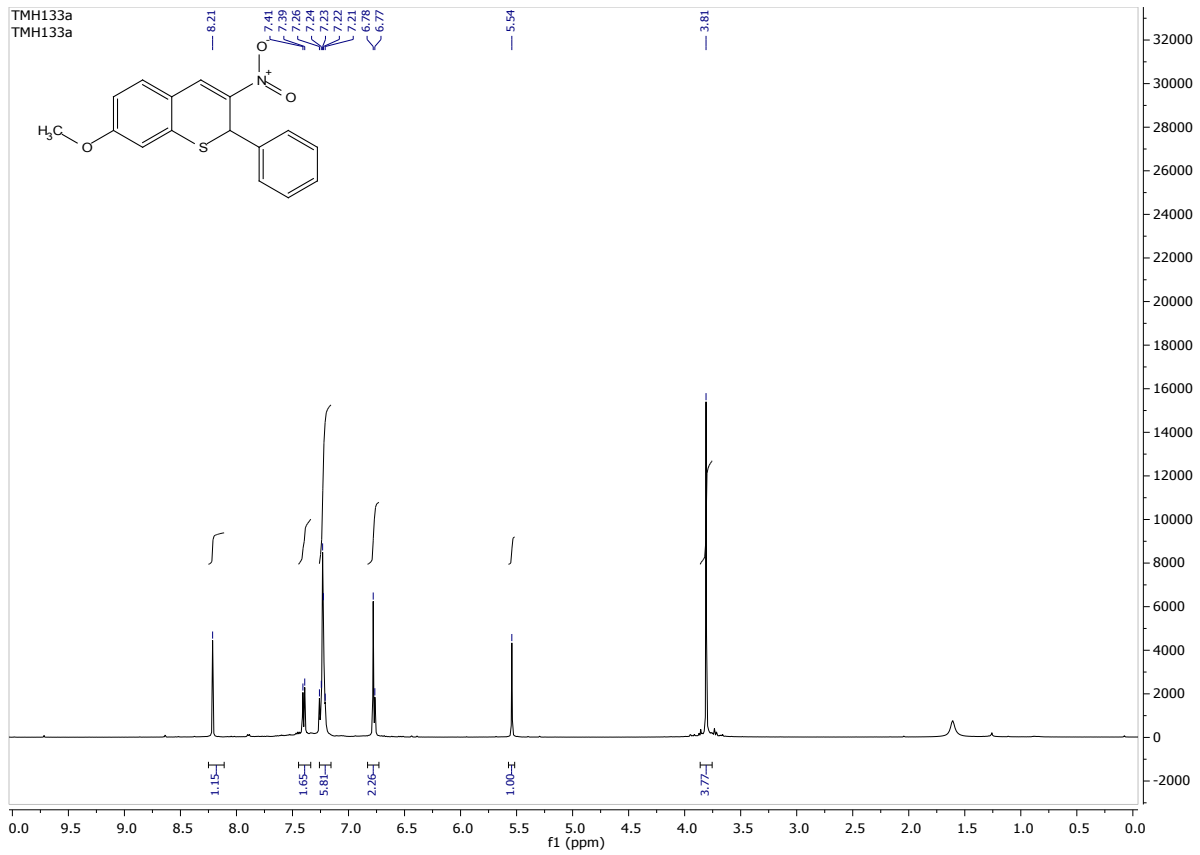

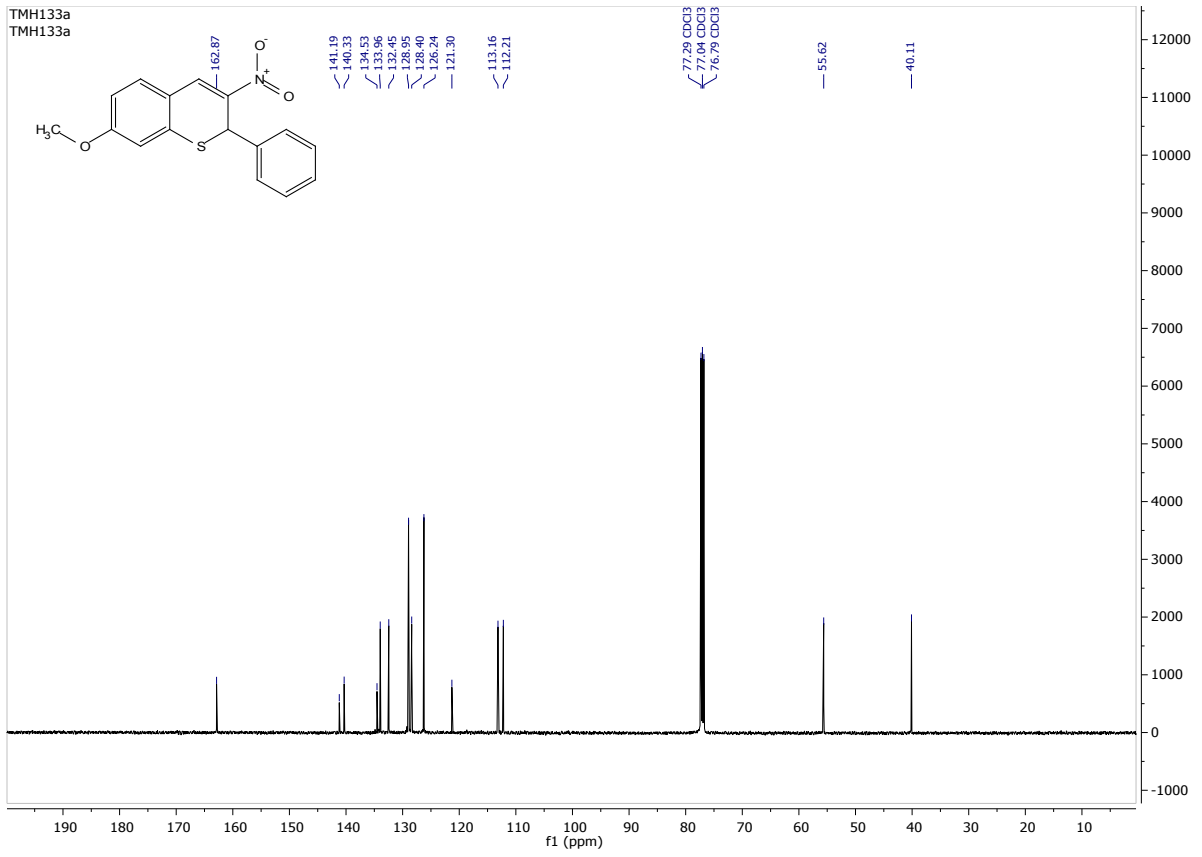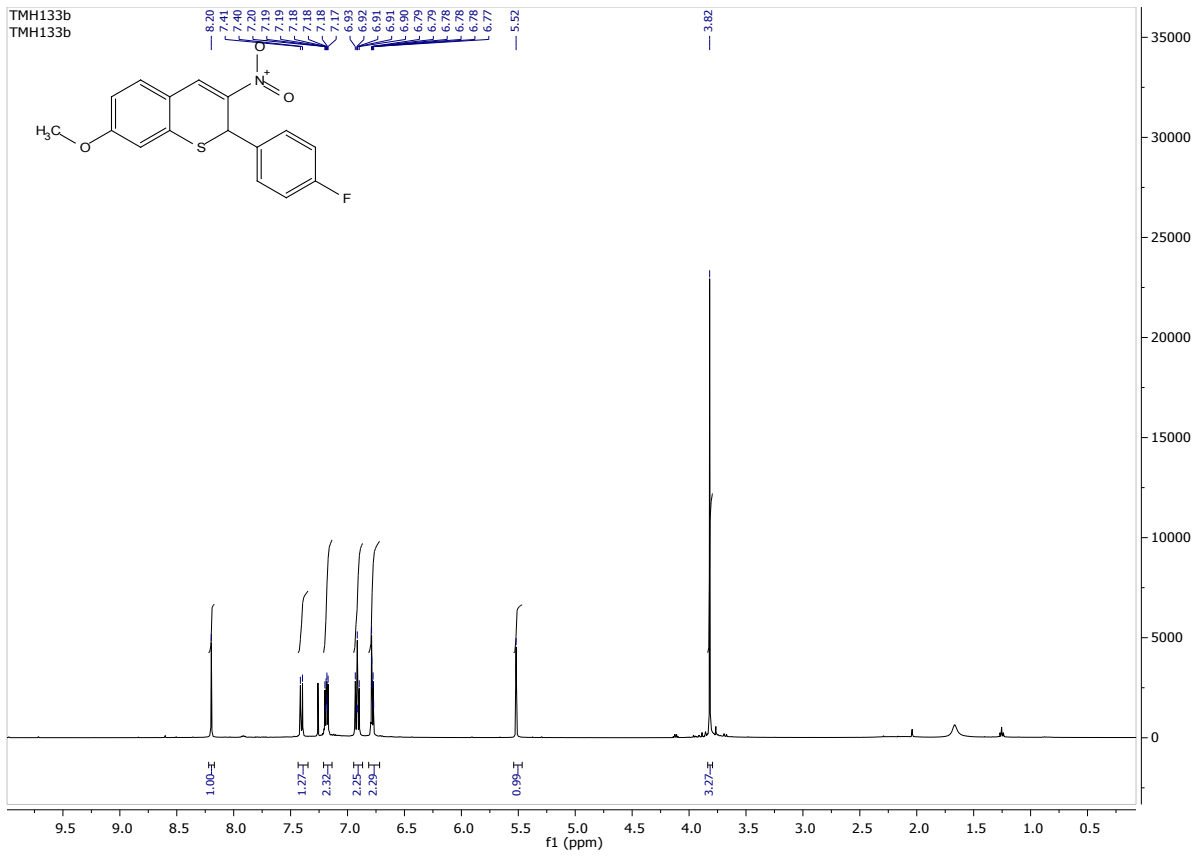



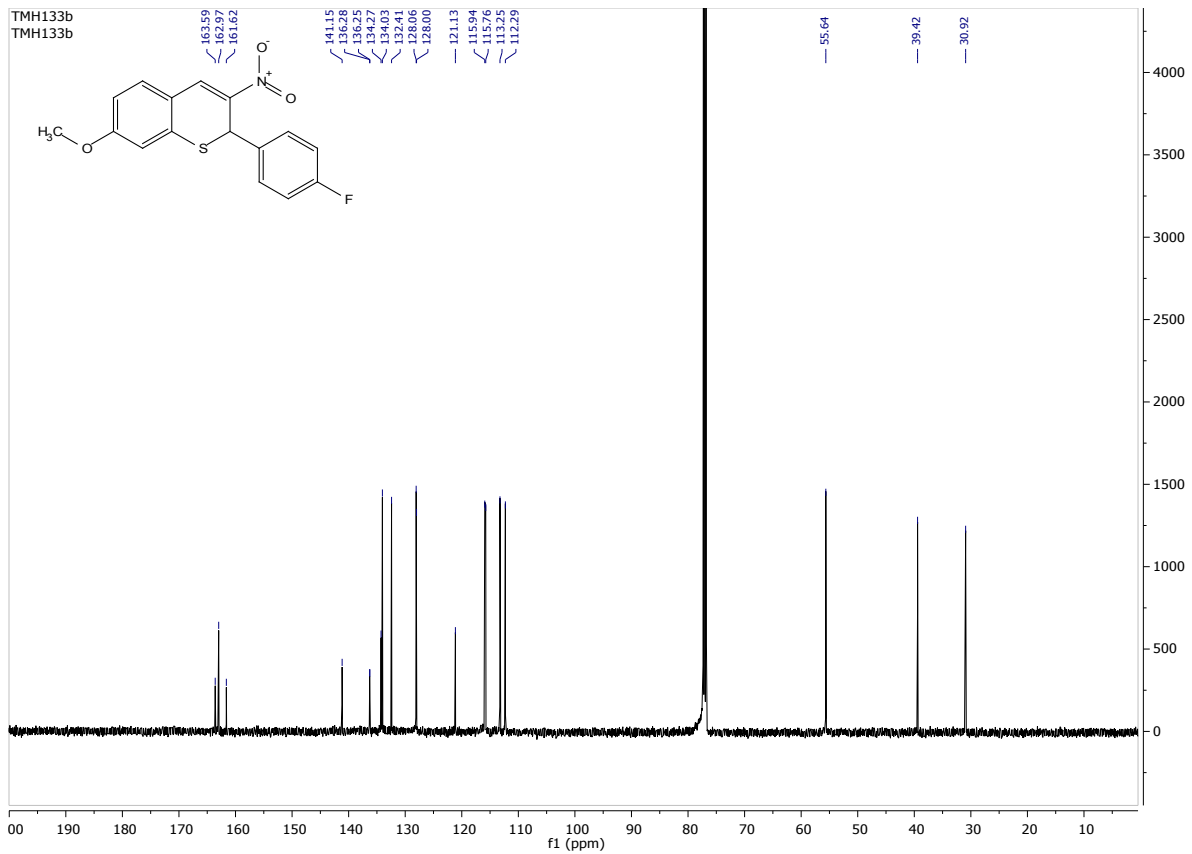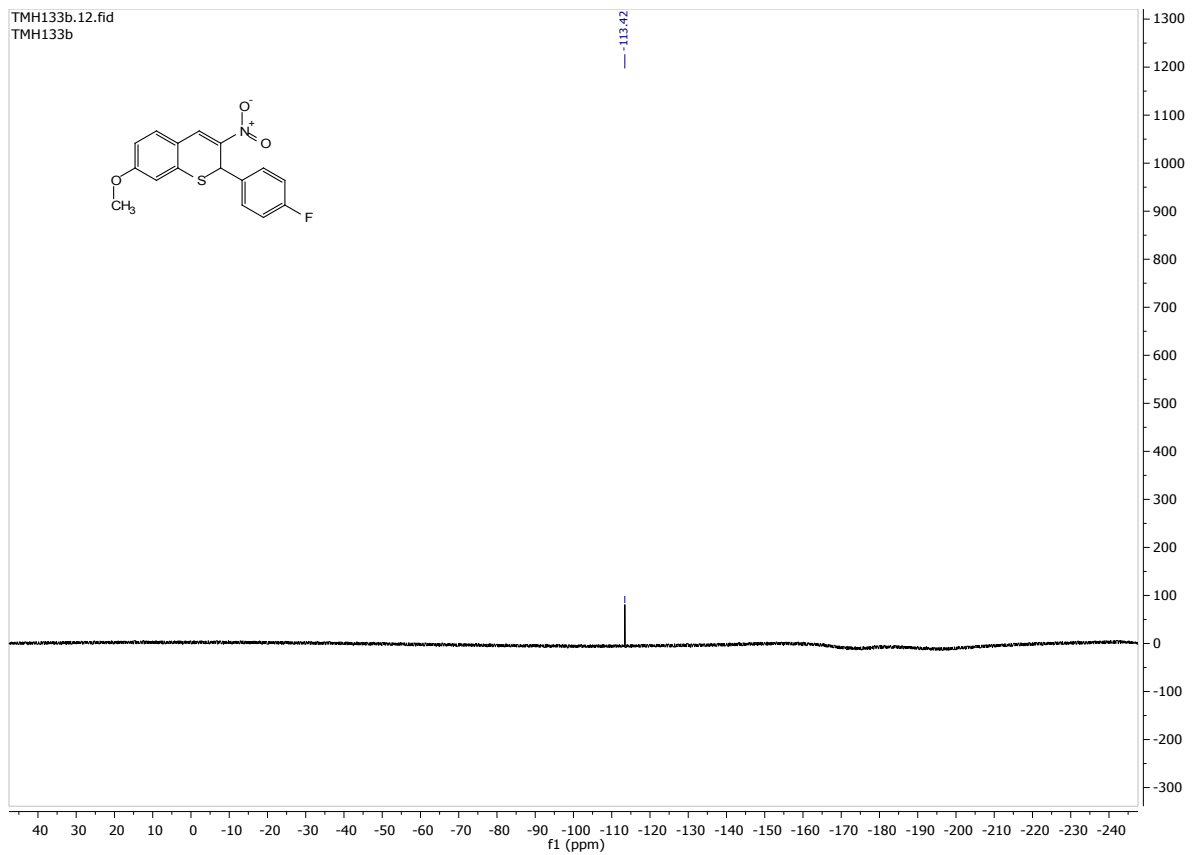

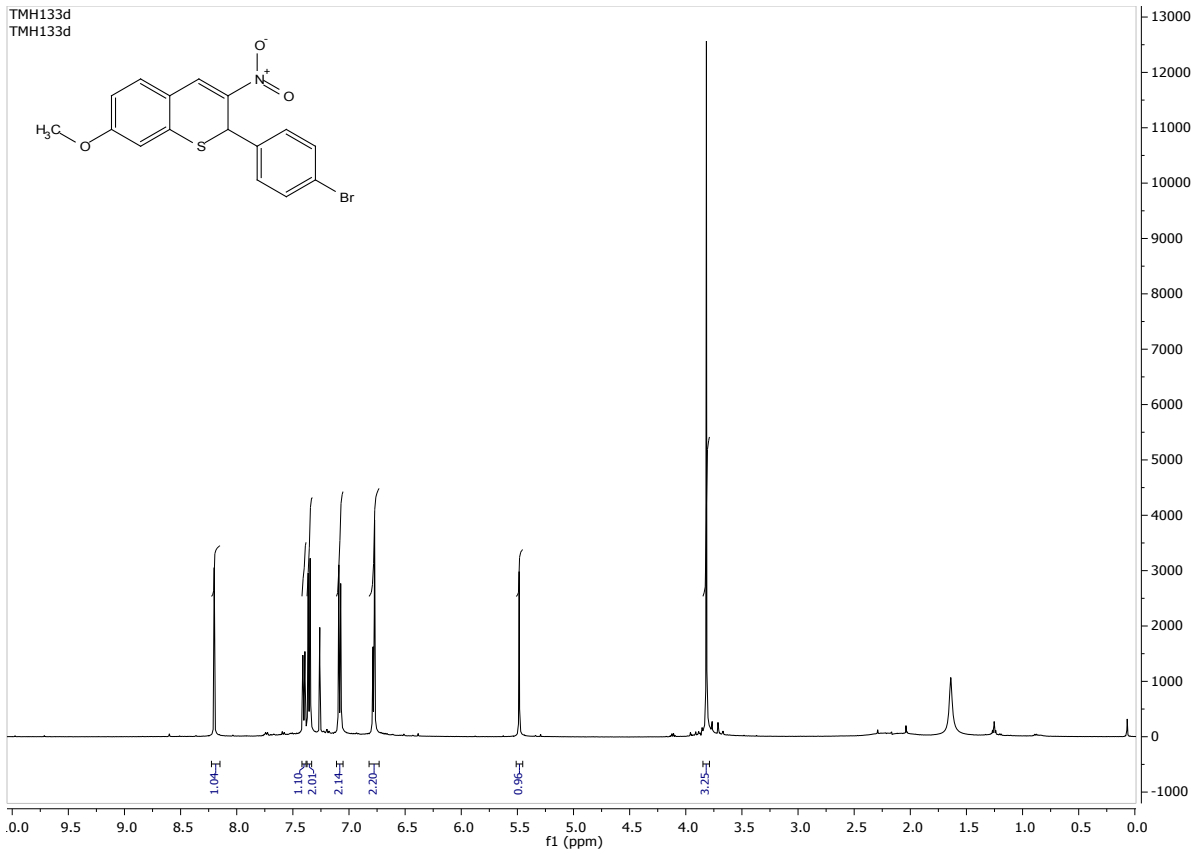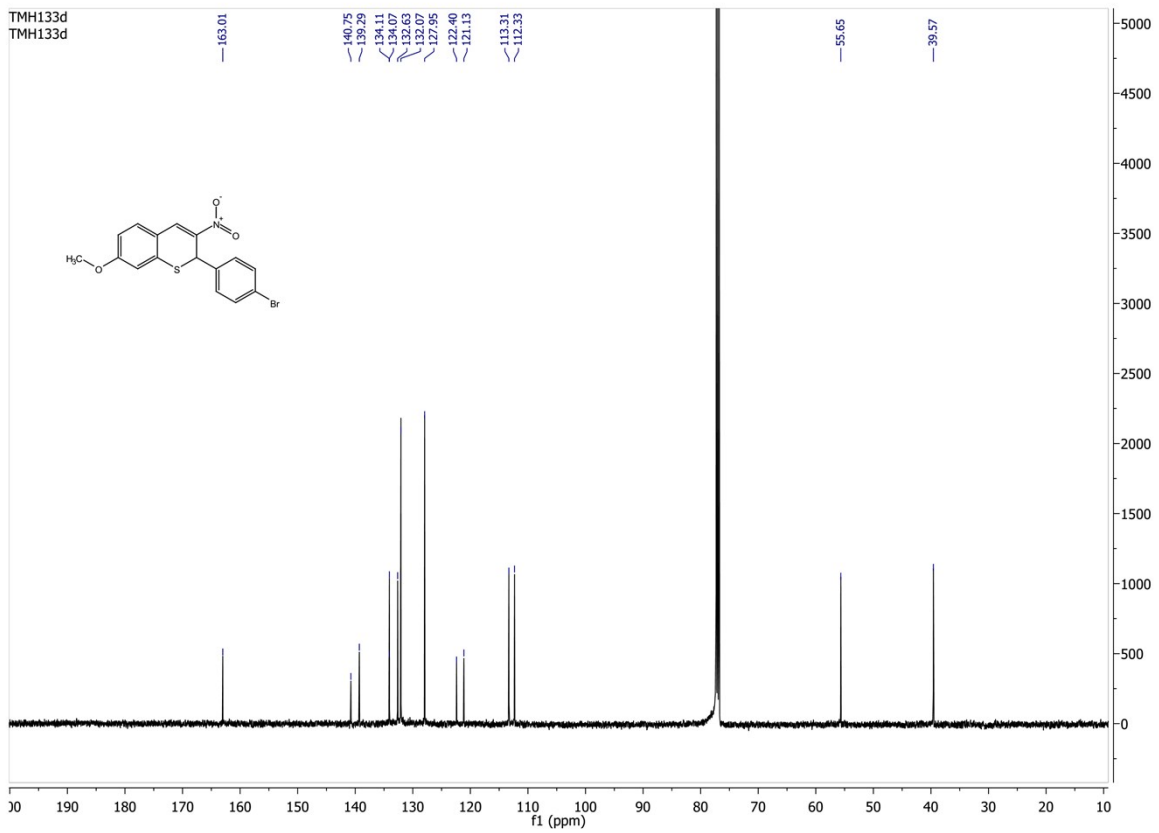

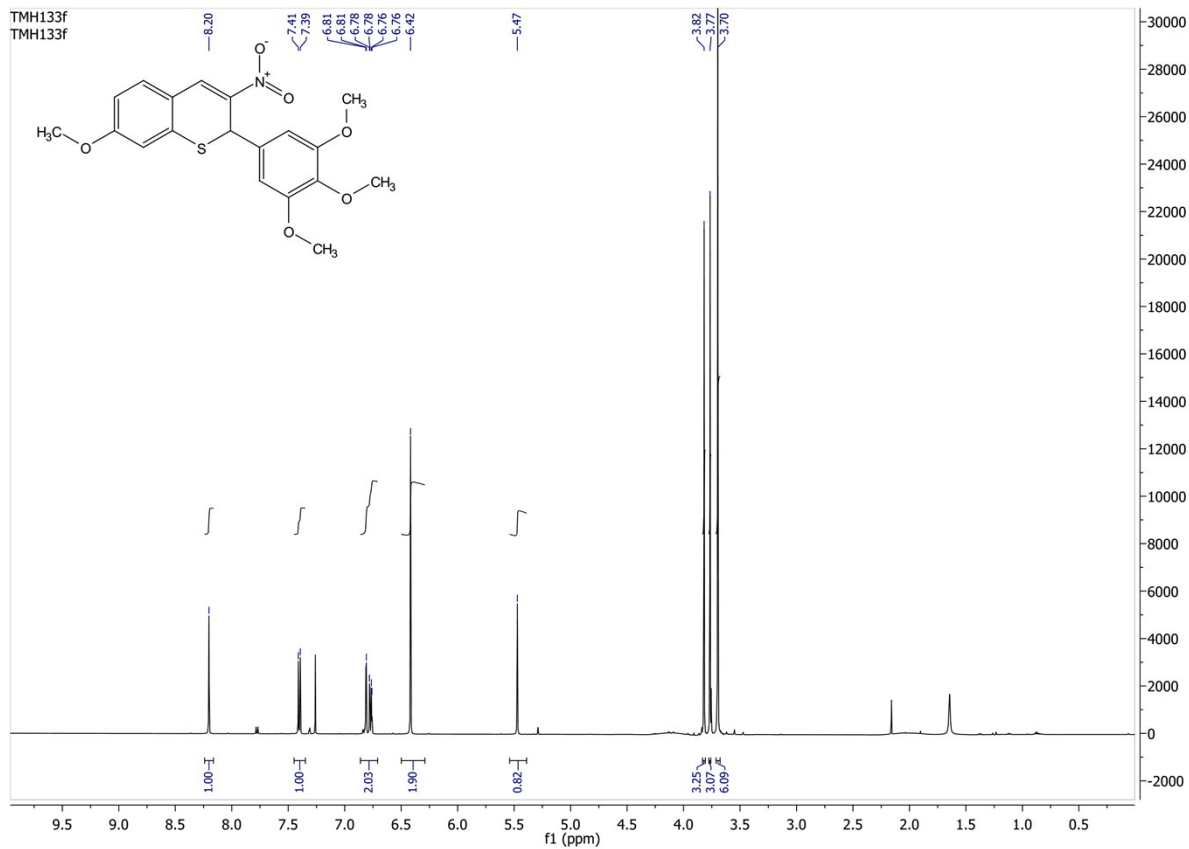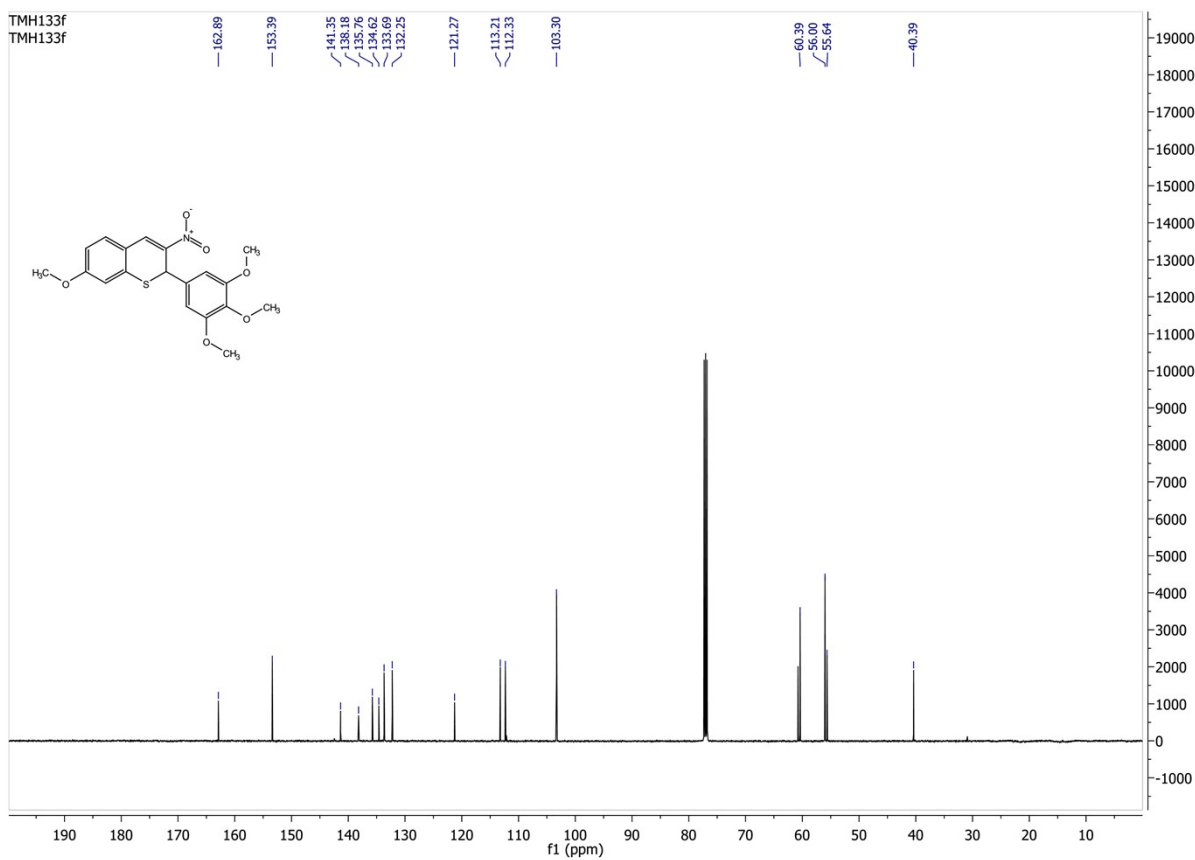

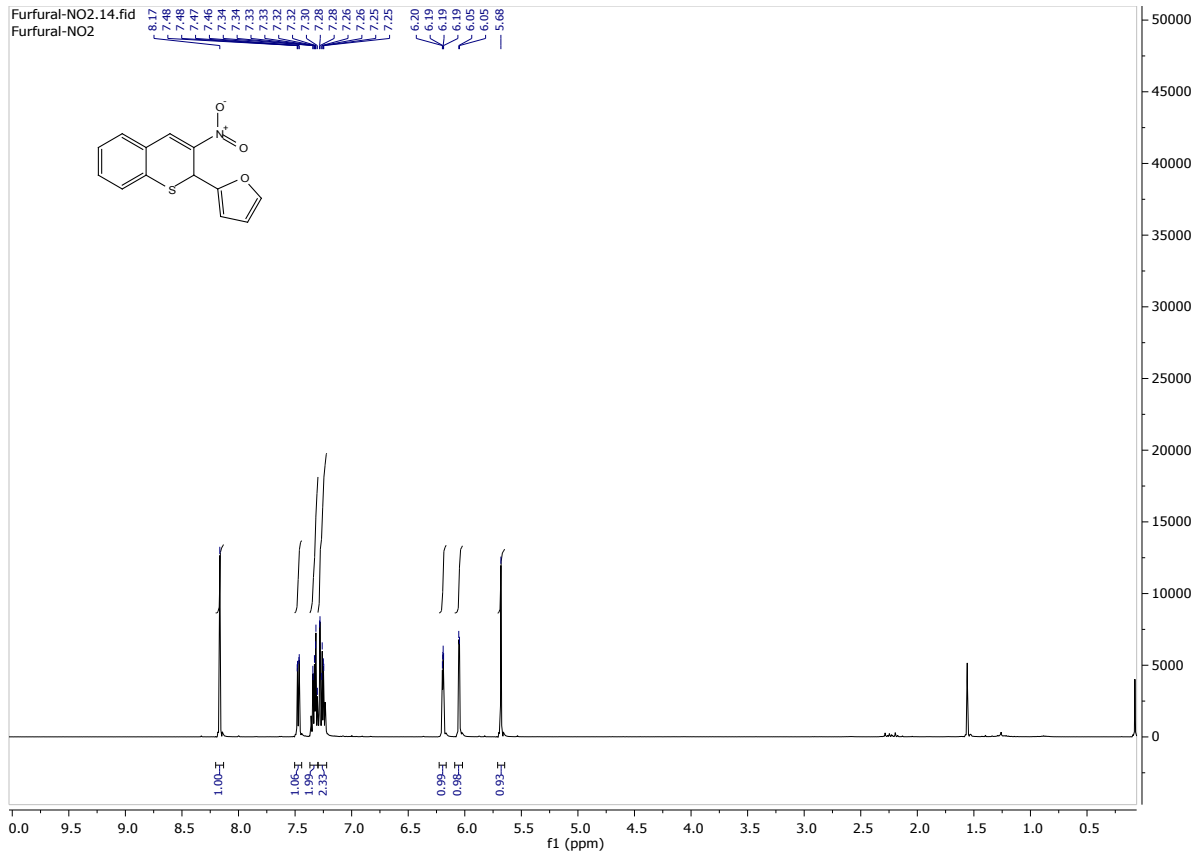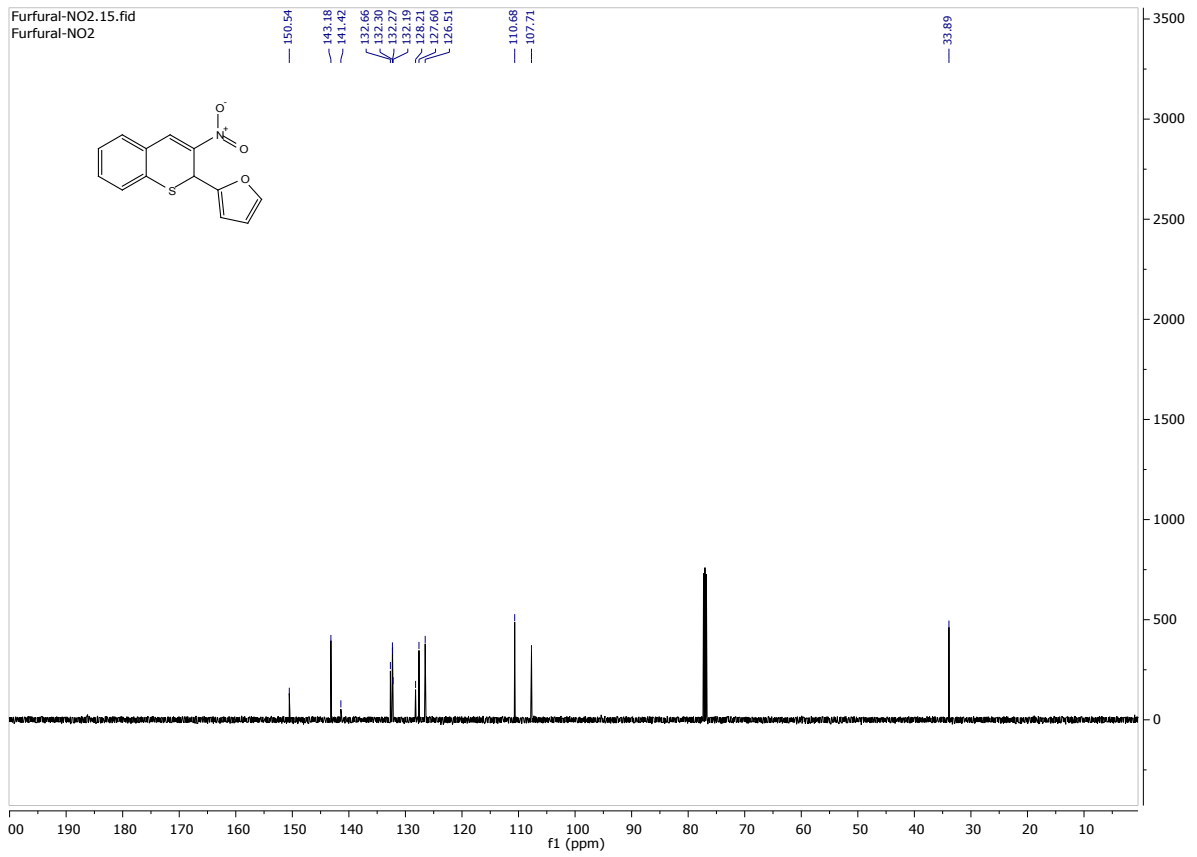



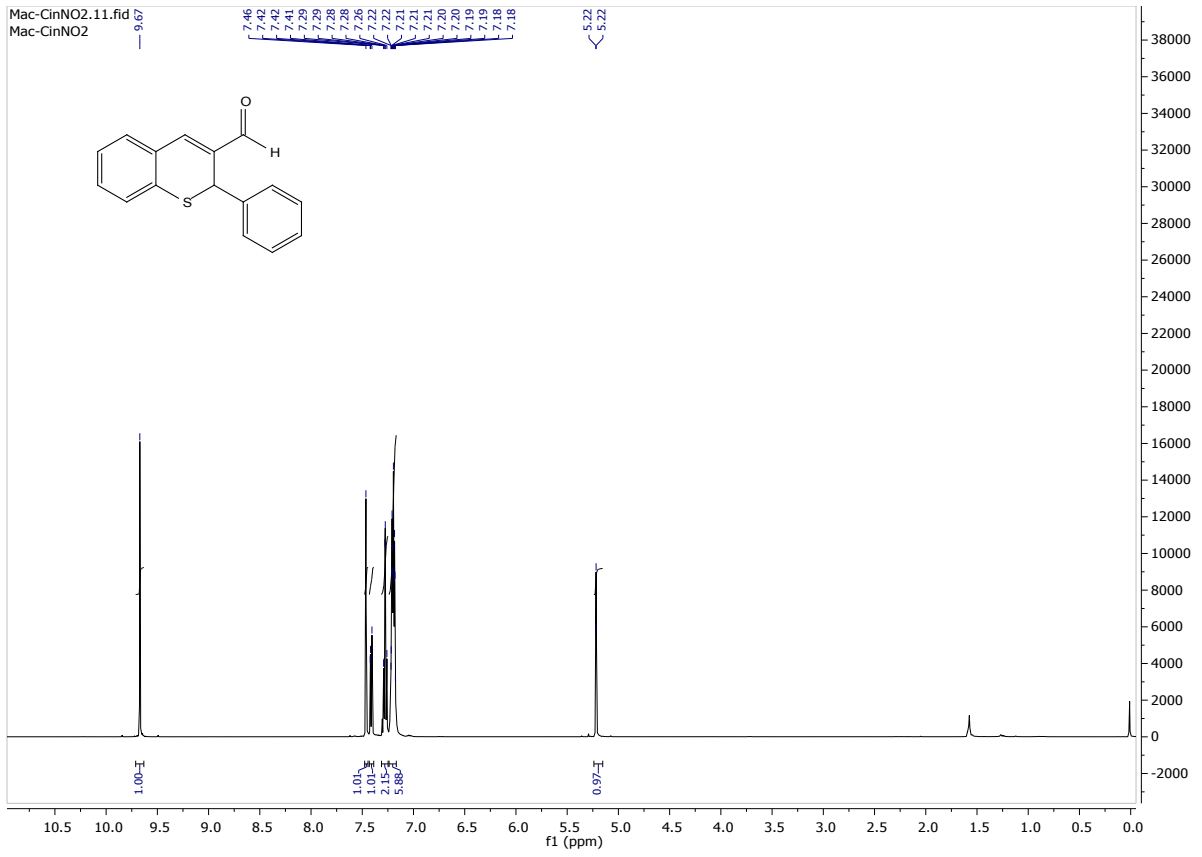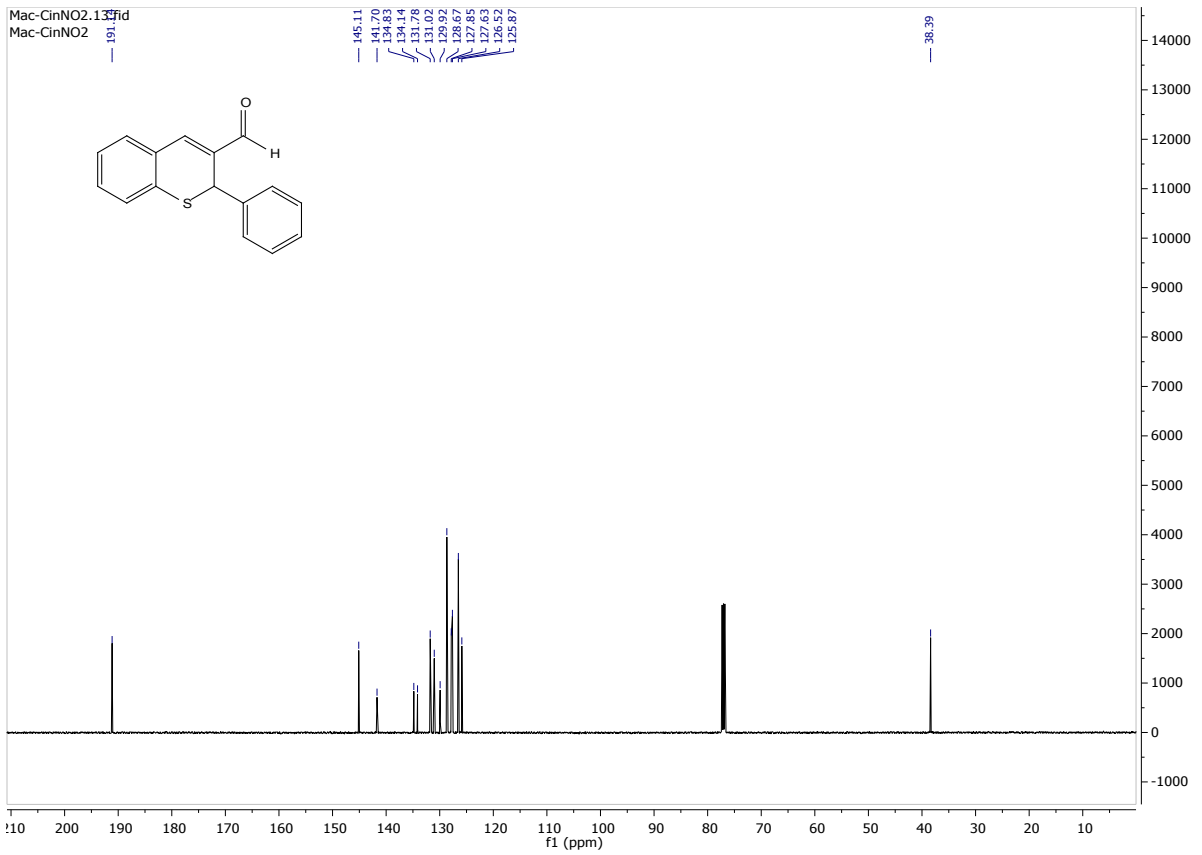

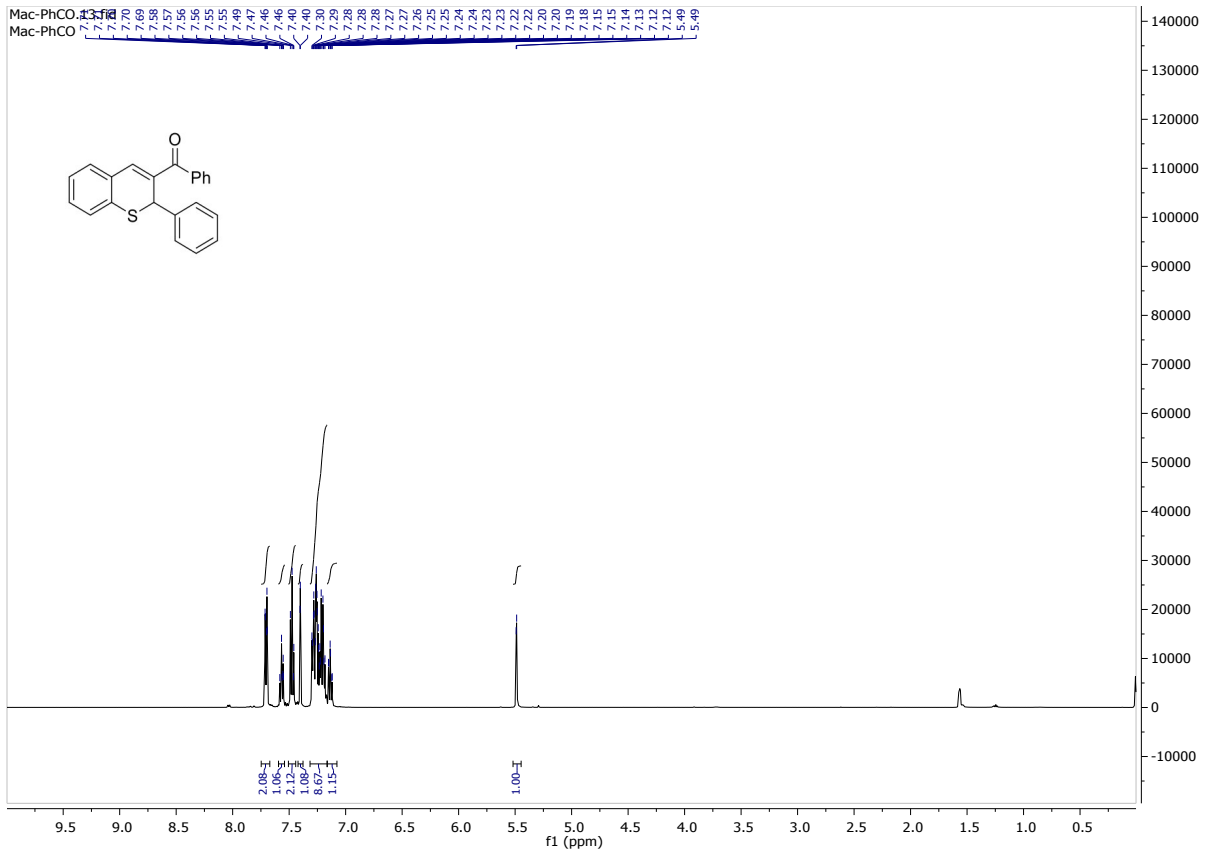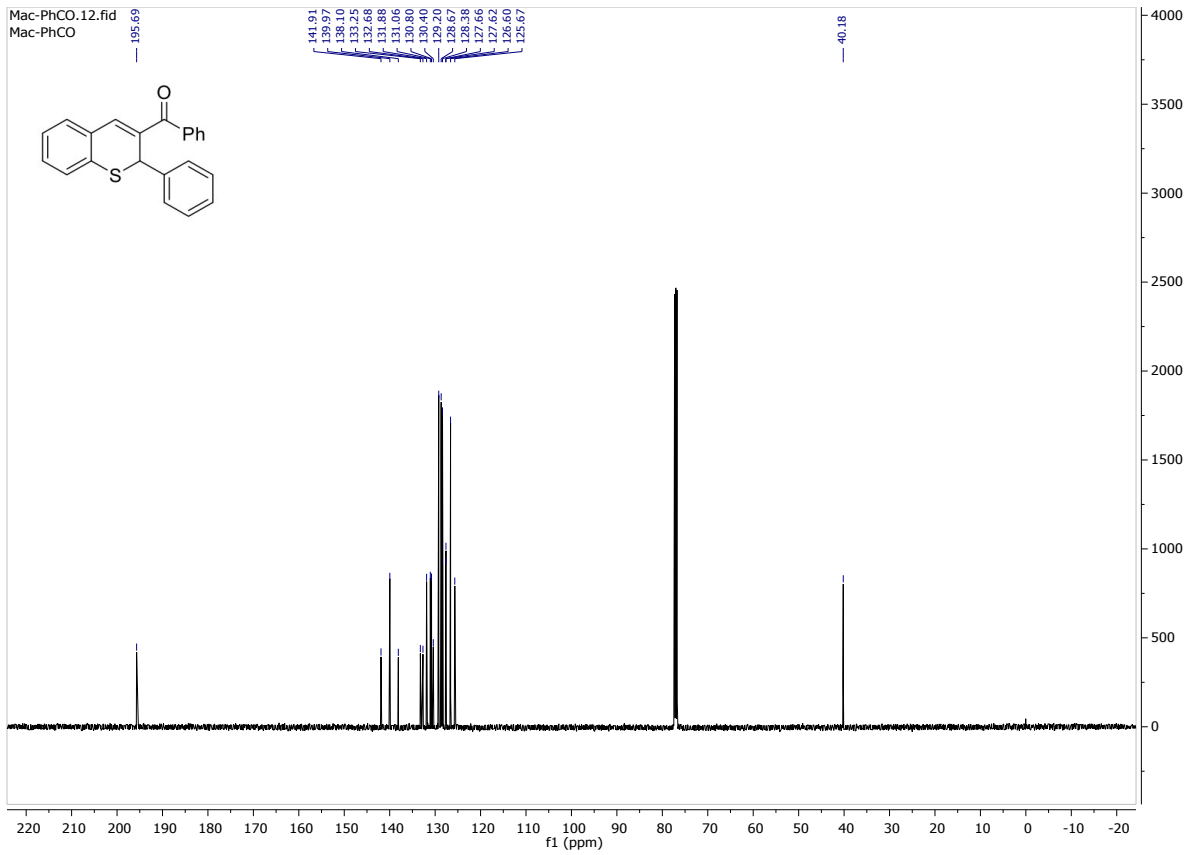

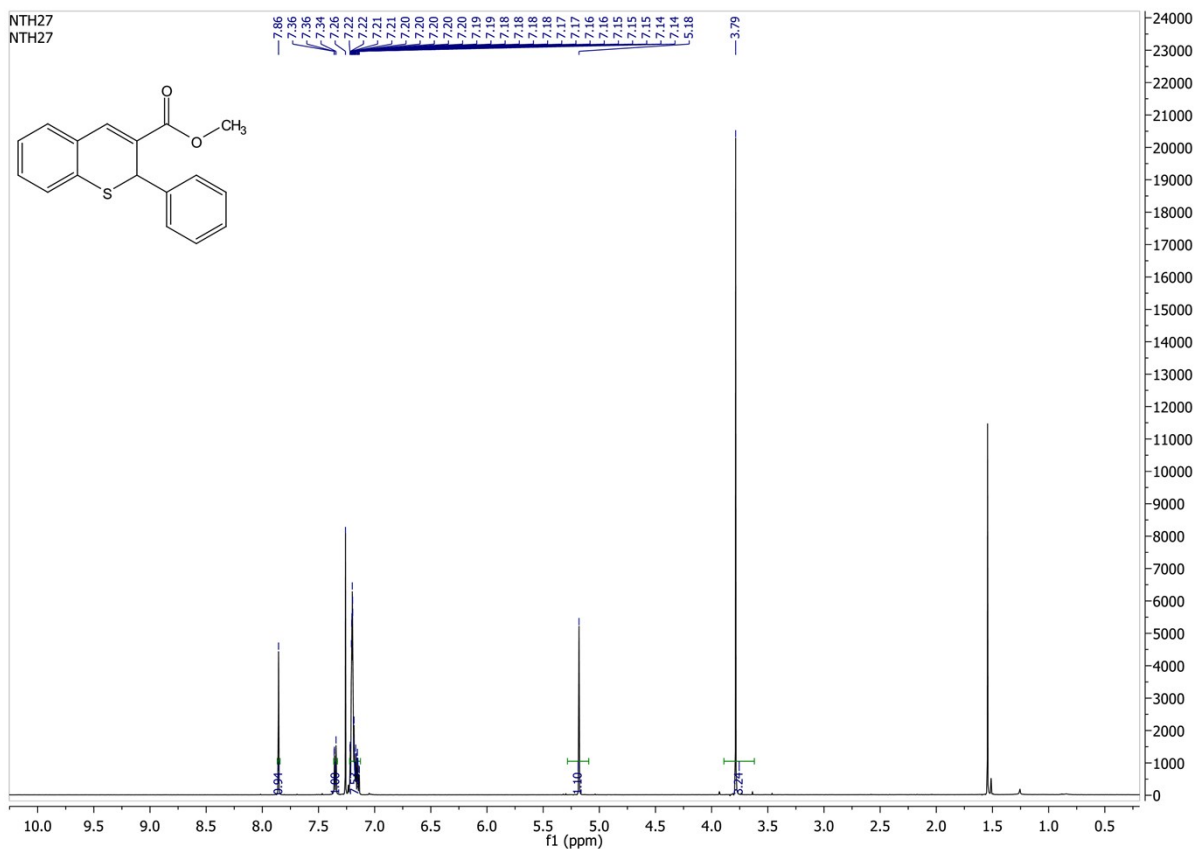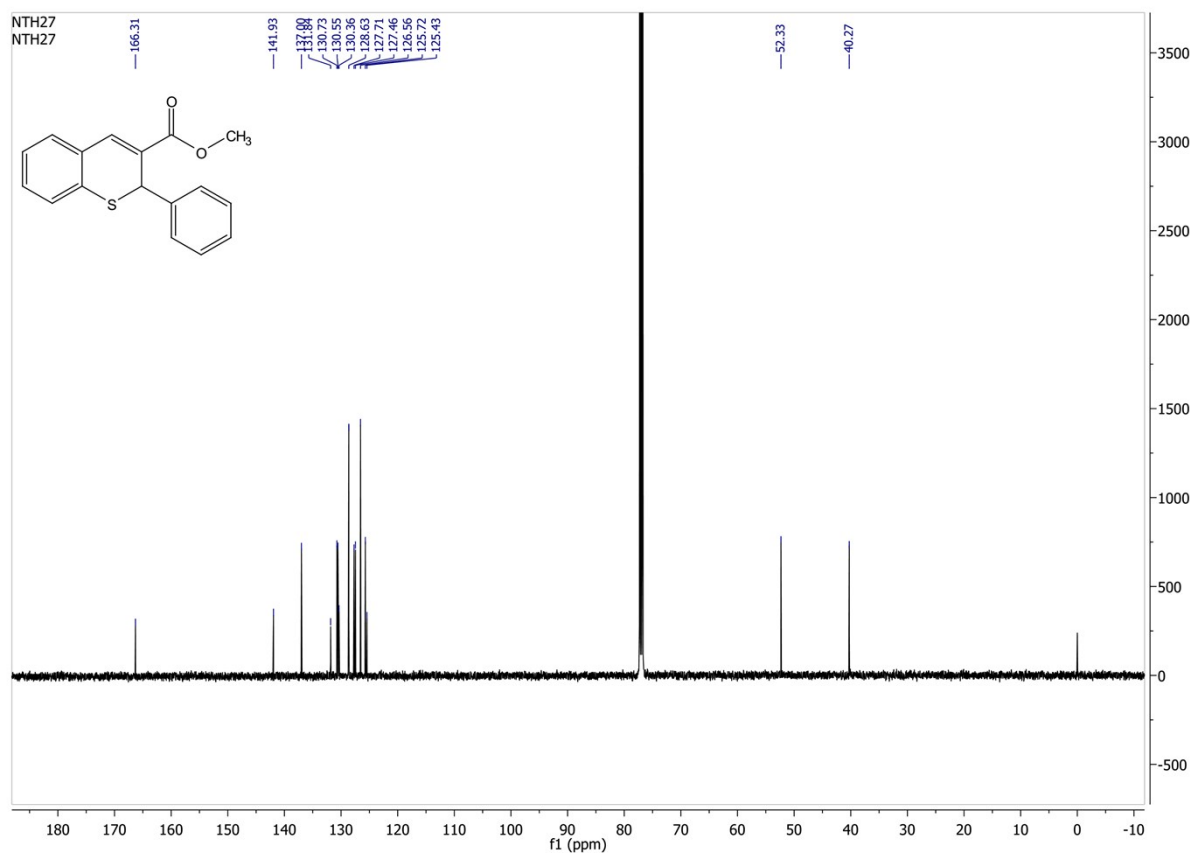

**Table 1 Crystal data and structure refinement for thiochrom.**

Identification code                      thiochrom



|                                             |                                                               |
|---------------------------------------------|---------------------------------------------------------------|
| Empirical formula                           | C <sub>15</sub> H <sub>11</sub> NO <sub>2</sub> S             |
| Formula weight                              | 269.31                                                        |
| Temperature/K                               | 100.0                                                         |
| Crystal system                              | monoclinic                                                    |
| Space group                                 | P2 <sub>1</sub> /c                                            |
| a/Å                                         | 8.9636(3)                                                     |
| b/Å                                         | 10.3969(4)                                                    |
| c/Å                                         | 13.4271(5)                                                    |
| α/°                                         | 90                                                            |
| β/°                                         | 94.8620(10)                                                   |
| γ/°                                         | 90                                                            |
| Volume/Å <sup>3</sup>                       | 1246.82(8)                                                    |
| Z                                           | 4                                                             |
| ρ <sub>calc</sub> /g/cm <sup>3</sup>        | 1.435                                                         |
| μ/mm <sup>-1</sup>                          | 0.255                                                         |
| F(000)                                      | 560.0                                                         |
| Crystal size/mm <sup>3</sup>                | 0.17 × 0.17 × 0.12                                            |
| Radiation                                   | MoKα (λ = 0.71073)                                            |
| 2θ range for data collection/°              | 6.014 to 56.664                                               |
| Index ranges                                | -11 ≤ h ≤ 11, -13 ≤ k ≤ 13, -17 ≤ l ≤ 17                      |
| Reflections collected                       | 31745                                                         |
| Independent reflections                     | 3105 [R <sub>int</sub> = 0.0290, R <sub>sigma</sub> = 0.0140] |
| Data/restraints/parameters                  | 3105/0/172                                                    |
| Goodness-of-fit on F <sup>2</sup>           | 1.059                                                         |
| Final R indexes [I ≥ 2σ (I)]                | R <sub>1</sub> = 0.0296, wR <sub>2</sub> = 0.0721             |
| Final R indexes [all data]                  | R <sub>1</sub> = 0.0344, wR <sub>2</sub> = 0.0746             |
| Largest diff. peak/hole / e Å <sup>-3</sup> | 0.38/-0.24                                                    |

**Table 2 Fractional Atomic Coordinates (×10<sup>4</sup>) and Equivalent Isotropic Displacement Parameters (Å<sup>2</sup>×10<sup>3</sup>) for thiochrom. U<sub>eq</sub> is defined as 1/3 of the trace of the orthogonalised U<sub>ij</sub> tensor.**

| Atom | x           | y           | z          | U(eq)      |
|------|-------------|-------------|------------|------------|
| O1   | 6056.6 (10) | 4152.9 (9)  | 2182.4 (7) | 20.86 (19) |
| N1   | 5140.1 (11) | 5018.6 (10) | 2267.2 (7) | 15.0 (2)   |
| C1   | 3063.6 (12) | 6064.5 (11) | 3099.4 (8) | 12.4 (2)   |
| C2   | 4199.5 (12) | 5000.4 (11) | 3114.0 (8) | 12.3 (2)   |
| O2   | 4941.9 (11) | 5909.6 (9)  | 1665.8 (7) | 26.4 (2)   |
| C3   | 4377.5 (12) | 4016.8 (11) | 3755.4 (8) | 12.9 (2)   |
| C4   | 3511.8 (12) | 3858.2 (11) | 4613.8 (8) | 12.5 (2)   |
| C5   | 3639.8 (13) | 2712.7 (11) | 5167.8 (9) | 15.2 (2)   |
| C6   | 2851.5 (13) | 2547.6 (12) | 6004.2 (9) | 17.8 (2)   |
| C7   | 1908.7 (13) | 3518.2 (12) | 6293.7 (9) | 17.5 (2)   |

|     |             |             |            |           |
|-----|-------------|-------------|------------|-----------|
| C8  | 1756.0 (13) | 4656.4 (12) | 5750.5 (9) | 15.6 (2)  |
| C9  | 2570.1 (12) | 4842.2 (11) | 4918.3 (8) | 12.9 (2)  |
| S10 | 2511.3 (3)  | 6372.5 (3)  | 4362.5 (2) | 13.95 (8) |
| C11 | 1708.6 (12) | 5834.7 (11) | 2360.1 (8) | 12.4 (2)  |
| C12 | 885.3 (13)  | 4696.0 (11) | 2370.2 (8) | 14.3 (2)  |
| C13 | -387.3 (13) | 4533.3 (12) | 1712.4 (9) | 17.5 (2)  |
| C14 | -846.8 (14) | 5504.6 (13) | 1041.5 (9) | 19.7 (2)  |
| C15 | -23.3 (14)  | 6631.9 (12) | 1019.7 (9) | 20.0 (3)  |
| C16 | 1255.5 (13) | 6793.9 (12) | 1674.9 (9) | 16.9 (2)  |

**Table 3 Anisotropic Displacement Parameters ( $\text{\AA}^2 \times 10^3$ ) for thiochrom. The Anisotropic displacement factor exponent takes the form:  $-2\pi^2[h^2a^{*2}U_{11}+2hka^*b^*U_{12}+\dots]$ .**

| Atom | $U_{11}$   | $U_{22}$   | $U_{33}$   | $U_{23}$   | $U_{13}$  | $U_{12}$  |
|------|------------|------------|------------|------------|-----------|-----------|
| O1   | 19.5 (4)   | 18.7 (4)   | 25.9 (5)   | 0.3 (4)    | 10.5 (3)  | 4.3 (3)   |
| N1   | 13.7 (5)   | 15.3 (5)   | 16.5 (5)   | -0.1 (4)   | 3.7 (4)   | -1.4 (4)  |
| C1   | 12.9 (5)   | 11.4 (5)   | 13.0 (5)   | 0.2 (4)    | 2.1 (4)   | 0.1 (4)   |
| C2   | 10.0 (5)   | 13.9 (5)   | 13.1 (5)   | -1.7 (4)   | 2.1 (4)   | -0.6 (4)  |
| O2   | 31.3 (5)   | 25.1 (5)   | 24.7 (5)   | 11.2 (4)   | 12.8 (4)  | 6.6 (4)   |
| C3   | 10.3 (5)   | 13.8 (5)   | 14.5 (5)   | -1.7 (4)   | 0.9 (4)   | 0.4 (4)   |
| C4   | 10.5 (5)   | 14.4 (5)   | 12.2 (5)   | -0.7 (4)   | -0.7 (4)  | -0.8 (4)  |
| C5   | 13.2 (5)   | 16.1 (5)   | 16.2 (5)   | 0.4 (4)    | 0.3 (4)   | 1.4 (4)   |
| C6   | 17.6 (6)   | 19.0 (6)   | 16.7 (5)   | 4.3 (4)    | 0.1 (4)   | -0.9 (5)  |
| C7   | 16.0 (5)   | 23.6 (6)   | 13.3 (5)   | 0.4 (4)    | 2.9 (4)   | -2.4 (5)  |
| C8   | 13.4 (5)   | 18.4 (6)   | 15.2 (5)   | -3.8 (4)   | 1.8 (4)   | 0.1 (4)   |
| C9   | 11.6 (5)   | 14.1 (5)   | 12.5 (5)   | -1.0 (4)   | -1.6 (4)  | -0.4 (4)  |
| S10  | 15.66 (14) | 12.12 (14) | 14.05 (14) | -1.90 (10) | 1.18 (10) | 2.11 (10) |
| C11  | 11.4 (5)   | 14.0 (5)   | 12.1 (5)   | -1.4 (4)   | 2.6 (4)   | 1.9 (4)   |
| C12  | 14.8 (5)   | 13.9 (5)   | 14.3 (5)   | 0.1 (4)    | 2.4 (4)   | 1.5 (4)   |
| C13  | 16.0 (5)   | 17.4 (6)   | 19.2 (6)   | -3.0 (4)   | 2.3 (4)   | -2.0 (4)  |
| C14  | 16.3 (6)   | 25.5 (6)   | 16.7 (6)   | -2.7 (5)   | -2.3 (4)  | 1.6 (5)   |
| C15  | 21.3 (6)   | 21.6 (6)   | 16.7 (6)   | 3.9 (5)    | -1.8 (5)  | 3.4 (5)   |
| C16  | 17.9 (6)   | 15.4 (5)   | 17.3 (5)   | 1.7 (4)    | 1.7 (4)   | 0.3 (4)   |

**Table 4 Bond Lengths for thiochrom.**

| Atom | Atom | Length/ $\text{\AA}$ | Atom | Atom | Length/ $\text{\AA}$ |
|------|------|----------------------|------|------|----------------------|
| O1   | N1   | 1.2304 (13)          | C6   | C7   | 1.3926 (17)          |
| N1   | C2   | 1.4719 (14)          | C7   | C8   | 1.3907 (17)          |
| N1   | O2   | 1.2318 (13)          | C8   | C9   | 1.3988 (16)          |
| C1   | C2   | 1.5025 (15)          | C9   | S10  | 1.7562 (12)          |
| C1   | S10  | 1.8348 (11)          | C11  | C12  | 1.3958 (16)          |
| C1   | C11  | 1.5210 (15)          | C11  | C16  | 1.3938 (16)          |
| C2   | C3   | 1.3377 (16)          | C12  | C13  | 1.3925 (16)          |

|    |    |             |     |     |             |
|----|----|-------------|-----|-----|-------------|
| C3 | C4 | 1.4525 (15) | C13 | C14 | 1.3921 (17) |
| C4 | C5 | 1.4037 (16) | C14 | C15 | 1.3868 (18) |
| C4 | C9 | 1.4089 (15) | C15 | C16 | 1.3947 (17) |
| C5 | C6 | 1.3872 (16) |     |     |             |

**Table 5 Bond Angles for thiochrom.**

| Atom | Atom | Atom | Angle/°     | Atom | Atom | Atom | Angle/°     |
|------|------|------|-------------|------|------|------|-------------|
| O1   | N1   | C2   | 119.52 (9)  | C8   | C7   | C6   | 120.35 (11) |
| O1   | N1   | O2   | 123.36 (10) | C7   | C8   | C9   | 120.11 (11) |
| O2   | N1   | C2   | 117.12 (9)  | C4   | C9   | S10  | 122.12 (9)  |
| C2   | C1   | S10  | 110.62 (8)  | C8   | C9   | C4   | 119.83 (10) |
| C2   | C1   | C11  | 113.30 (9)  | C8   | C9   | S10  | 117.76 (9)  |
| C11  | C1   | S10  | 111.57 (7)  | C9   | S10  | C1   | 103.53 (5)  |
| N1   | C2   | C1   | 114.35 (9)  | C12  | C11  | C1   | 121.37 (10) |
| C3   | C2   | N1   | 117.53 (10) | C16  | C11  | C1   | 119.36 (10) |
| C3   | C2   | C1   | 127.95 (10) | C16  | C11  | C12  | 119.25 (10) |
| C2   | C3   | C4   | 123.72 (10) | C13  | C12  | C11  | 120.15 (11) |
| C5   | C4   | C3   | 119.45 (10) | C14  | C13  | C12  | 120.26 (11) |
| C5   | C4   | C9   | 119.11 (10) | C15  | C14  | C13  | 119.86 (11) |
| C9   | C4   | C3   | 121.42 (10) | C14  | C15  | C16  | 119.95 (11) |
| C6   | C5   | C4   | 120.63 (11) | C11  | C16  | C15  | 120.52 (11) |
| C5   | C6   | C7   | 119.94 (11) |      |      |      |             |

**Table 6 Torsion Angles for thiochrom.**

| A  | B   | C   | D   | Angle/°     | A   | B   | C   | D   | Angle/°     |
|----|-----|-----|-----|-------------|-----|-----|-----|-----|-------------|
| O1 | N1  | C2  | C1  | 176.50 (10) | C5  | C6  | C7  | C8  | -0.23 (18)  |
| O1 | N1  | C2  | C3  | -0.80 (15)  | C6  | C7  | C8  | C9  | -1.10 (17)  |
| N1 | C2  | C3  | C4  | 178.86 (10) | C7  | C8  | C9  | C4  | 1.88 (17)   |
| C1 | C2  | C3  | C4  | -3.83 (18)  | C7  | C8  | C9  | S10 | -172.03 (9) |
| C1 | C11 | C12 | C13 | 177.29 (10) | C8  | C9  | S10 | C1  | -159.38 (9) |
| C1 | C11 | C16 | C15 | 177.03 (10) | C9  | C4  | C5  | C6  | 0.01 (17)   |
| C2 | C1  | S10 | C9  | -34.40 (9)  | S10 | C1  | C2  | N1  | -156.79 (8) |
| C2 | C1  | C11 | C12 | 52.96 (14)  | S10 | C1  | C2  | C3  | 28.04 (15)  |
| C2 | C1  | C11 | C16 | 128.72 (11) | S10 | C1  | C11 | C12 | -72.66 (12) |
| C2 | C3  | C4  | C5  | 171.70 (11) | S10 | C1  | C11 | C16 | 105.65 (10) |
| C2 | C3  | C4  | C9  | -9.81 (17)  | C11 | C1  | C2  | N1  | 77.07 (12)  |
| O2 | N1  | C2  | C1  | 2.46 (14)   | C11 | C1  | C2  | C3  | -98.09 (13) |
| O2 | N1  | C2  | C3  | 178.16 (11) | C11 | C1  | S10 | C9  | 92.70 (8)   |
| C3 | C4  | C5  | C6  | 178.54 (10) | C11 | C12 | C13 | C14 | -0.03 (17)  |

|              |             |              |            |
|--------------|-------------|--------------|------------|
| C3 C4 C9 C8  | 179.83 (10) | C12C11C16C15 | 1.33 (17)  |
| C3 C4 C9 S10 | -6.19 (15)  | C12C13C14C15 | 0.81 (18)  |
| C4 C5 C6 C7  | 0.77 (18)   | C13C14C15C16 | -0.51 (19) |
| C4 C9 S10 C1 | 26.86 (10)  | C14C15C16C11 | -0.57 (18) |
| C5 C4 C9 C8  | -1.33 (16)  | C16C11C12C13 | -1.03 (16) |
| C5 C4 C9 S10 | 172.31 (8)  |              |            |

**Table 7 Hydrogen Atom Coordinates ( $\text{\AA} \times 10^4$ ) and Isotropic Displacement Parameters ( $\text{\AA}^2 \times 10^3$ ) for thiochrom.**

| Atom | x     | y    | z    | U(eq) |
|------|-------|------|------|-------|
| H1   | 3566  | 6862 | 2879 | 15    |
| H3   | 5112  | 3386 | 3643 | 15    |
| H5   | 4272  | 2044 | 4968 | 18    |
| H6   | 2955  | 1773 | 6379 | 21    |
| H7   | 1367  | 3402 | 6865 | 21    |
| H8   | 1098  | 5309 | 5945 | 19    |
| H12  | 1194  | 4030 | 2827 | 17    |
| H13  | -944  | 3757 | 1722 | 21    |
| H14  | -1723 | 5395 | 600  | 24    |
| H15  | -330  | 7293 | 559  | 24    |
| H16  | 1822  | 7564 | 1654 | 20    |

### Experimental

Single crystals of  $\text{C}_{15}\text{H}_{11}\text{NO}_2\text{S}$  [**thiochrom**] were [1]. A suitable crystal was selected and [1] on a **Bruker D8 Quest** diffractometer. The crystal was kept at 100.0 K during data collection. Using Olex2 [1], the structure was solved with the olex2.solve [2] structure solution program using Charge Flipping and refined with the olex2.refine [3] refinement package using Gauss-Newton minimisation.

1. Dolomanov, O.V., Bourhis, L.J., Gildea, R.J, Howard, J.A.K. & Puschmann, H. (2009), *J. Appl. Cryst.* 42, 339-341.
- 2.
- 3.

### Crystal structure determination of [**thiochrom**]

**Crystal Data** for  $\text{C}_{15}\text{H}_{11}\text{NO}_2\text{S}$  ( $M=269.31$  g/mol): monoclinic, space group  $P2_1/c$  (no. 14),  $a = 8.9636(3)$   $\text{\AA}$ ,  $b = 10.3969(4)$   $\text{\AA}$ ,  $c = 13.4271(5)$   $\text{\AA}$ ,  $\beta = 94.8620(10)^\circ$ ,  $V = 1246.82(8)$   $\text{\AA}^3$ ,  $Z = 4$ ,  $T = 100.0$  K,  $\mu(\text{MoK}\alpha) = 0.255$   $\text{mm}^{-1}$ ,  $D_{\text{calc}} = 1.435$   $\text{g/cm}^3$ , 31745 reflections measured ( $6.014^\circ \leq 2\theta \leq 56.664^\circ$ ), 3105 unique ( $R_{\text{int}} = 0.0290$ ,  $R_{\text{sigma}} = 0.0140$ ) which were used in all calculations. The final  $R_1$  was 0.0296 ( $I > 2\sigma(I)$ ) and  $wR_2$  was 0.0746 (all data).

### Refinement model description

Number of restraints - 0, number of constraints - unknown.

Details:

1. Fixed Uiso  
At 1.2 times of:  
All C(H) groups
- 2.a Ternary CH refined with riding coordinates:  
C1(H1)
- 2.b Aromatic/amide H refined with riding coordinates:  
C3(H3), C5(H5), C6(H6), C7(H7), C8(H8), C12(H12), C13(H13), C14(H14),  
C15(H15), C16(H16)
